# Supplementary material for: Analysis of DNA methylation-driven genes for predicting the prognosis of patients with colorectal cancer
Source: publisher site journal article supplement (doi:10.18632/aging.103949), 2020-11-16
Supplement: Supplementary file [file aging-v12i22-103949-supplementary-material-SD6.pdf]

## SUPPLEMENTARY TABLES

Supplementary Table 6. Gene ontology for 5 survival-associated methylation-driven genes.

|                  | <b>IZUMO family member 2(IZUMO2)</b>                                                                                                                                                                                                                                                                                                                                                                                                                                                                                                                                                                                                                                                                                                                                                                                                                                                                                                                                                                                                                            |
|------------------|-----------------------------------------------------------------------------------------------------------------------------------------------------------------------------------------------------------------------------------------------------------------------------------------------------------------------------------------------------------------------------------------------------------------------------------------------------------------------------------------------------------------------------------------------------------------------------------------------------------------------------------------------------------------------------------------------------------------------------------------------------------------------------------------------------------------------------------------------------------------------------------------------------------------------------------------------------------------------------------------------------------------------------------------------------------------|
| GOTERM_BP_DIRECT | regulation of transcription, DNA-templated,                                                                                                                                                                                                                                                                                                                                                                                                                                                                                                                                                                                                                                                                                                                                                                                                                                                                                                                                                                                                                     |
| GOTERM_CC_DIRECT | nucleus, integral component of membrane,                                                                                                                                                                                                                                                                                                                                                                                                                                                                                                                                                                                                                                                                                                                                                                                                                                                                                                                                                                                                                        |
| GOTERM_MF_DIRECT | transcription factor activity, sequence-specific DNA binding, sequence-specific DNA binding, transcription regulatory region DNA binding, MAGE family member A1(MAGEA1)                                                                                                                                                                                                                                                                                                                                                                                                                                                                                                                                                                                                                                                                                                                                                                                                                                                                                         |
| GOTERM_BP_DIRECT | negative regulation of transcription from RNA polymerase II promoter, transcription, DNA-templated, negative regulation of Notch signaling pathway,                                                                                                                                                                                                                                                                                                                                                                                                                                                                                                                                                                                                                                                                                                                                                                                                                                                                                                             |
| GOTERM_CC_DIRECT | nucleus, cytoplasm, plasma membrane,                                                                                                                                                                                                                                                                                                                                                                                                                                                                                                                                                                                                                                                                                                                                                                                                                                                                                                                                                                                                                            |
| GOTERM_MF_DIRECT | protein binding, histone deacetylase binding, NOVA alternative splicing regulator 1(NOVA1)                                                                                                                                                                                                                                                                                                                                                                                                                                                                                                                                                                                                                                                                                                                                                                                                                                                                                                                                                                      |
| GOTERM_BP_DIRECT | mRNA splicing, via spliceosome, RNA processing, chemical synaptic transmission, locomotory behavior, RNA splicing, regulation of RNA metabolic process,                                                                                                                                                                                                                                                                                                                                                                                                                                                                                                                                                                                                                                                                                                                                                                                                                                                                                                         |
| GOTERM_CC_DIRECT | nucleus, nucleolus, intracellular membrane-bounded organelle,                                                                                                                                                                                                                                                                                                                                                                                                                                                                                                                                                                                                                                                                                                                                                                                                                                                                                                                                                                                                   |
| GOTERM_MF_DIRECT | RNA binding, mRNA binding, poly(A) RNA binding, POU class 4 homeobox 1(POU4F1)                                                                                                                                                                                                                                                                                                                                                                                                                                                                                                                                                                                                                                                                                                                                                                                                                                                                                                                                                                                  |
| GOTERM_BP_DIRECT | negative regulation of transcription from RNA polymerase II promoter, suckling behavior, ventricular compact myocardium morphogenesis, regulation of transcription from RNA polymerase II promoter, transcription from RNA polymerase II promoter, axonogenesis, synapse assembly, mesoderm development, positive regulation of gene expression, cell migration in hindbrain, trigeminal nerve development, central nervous system neuron differentiation, habenula development, neuron projection development, positive regulation of apoptotic process, negative regulation of neuron apoptotic process, positive regulation of transcription from RNA polymerase II promoter, neuron fate specification, sensory system development, peripheral nervous system neuron development, regulation of neurogenesis, proprioception involved in equilibrioception, innervation, positive regulation of cell cycle arrest, regulation of signal transduction by p53 class mediator, negative regulation of transcription elongation from RNA polymerase I promoter, |
| GOTERM_CC_DIRECT | nuclear chromatin, nucleoplasm, neuron projection,                                                                                                                                                                                                                                                                                                                                                                                                                                                                                                                                                                                                                                                                                                                                                                                                                                                                                                                                                                                                              |
| GOTERM_MF_DIRECT | RNA polymerase II distal enhancer sequence-specific DNA binding, RNA polymerase II transcription factor activity, sequence-specific DNA binding, transcriptional activator activity, RNA polymerase II core promoter proximal region sequence-specific binding, transcriptional activator activity, RNA polymerase II distal enhancer sequence-specific binding, chromatin binding, single-stranded DNA binding, transcription factor activity, RNA polymerase II distal enhancer sequence-specific binding, sequence-specific DNA binding, GTPase binding,                                                                                                                                                                                                                                                                                                                                                                                                                                                                                                     |
|                  | solute carrier organic anion transporter family member 4C1(SLCO4C1)                                                                                                                                                                                                                                                                                                                                                                                                                                                                                                                                                                                                                                                                                                                                                                                                                                                                                                                                                                                             |

|                  |                                                                                                                        |
|------------------|------------------------------------------------------------------------------------------------------------------------|
| GOTERM_BP_DIRECT | multicellular organism development, spermatogenesis, cell differentiation, sodium-independent organic anion transport, |
| GOTERM_CC_DIRECT | plasma membrane, integral component of plasma membrane, basolateral plasma membrane, extracellular exosome,            |
| GOTERM_MF_DIRECT | sodium-independent organic anion transmembrane transporter activity,                                                   |

**Supplementary Table 7. The primers used in Q-PCR.**

|         |                |                       |
|---------|----------------|-----------------------|
| SLCO4C1 | Forward primer | CAGACATGAAGAGCGCCAAAG |
|         | Reverse primer | AATCAGGCCAGTCAGGGAAC  |
| IZUMO2  | Forward primer | CGTGGTCATCGTGGTCTCAT  |
|         | Reverse primer | TGCAGCAGGAGTTTTTCGGTT |
| Gapdh   | Forward primer | TCACACCAAGTGTTCAGGACG |
|         | Reverse primer | CGCCTTCTGCCTTAACCTCA  |

**Supplementary Table 8. Clinical information of cancer samples.**

| barcode | sex    | age | Drug Treatment        |
|---------|--------|-----|-----------------------|
| MCA 1   | male   | 61  | FOLFOX                |
| MCA 2   | male   | 76  | capecitabine (Xeloda) |
| MCA 3   | male   | 62  | NULL                  |
| MCA 4   | famale | 67  | capecitabine (Xeloda) |
| MCA 5   | famale | 72  | capecitabine (Xeloda) |
| MCA 6   | famale | 71  | capecitabine (Xeloda) |
| MCA 7   | male   | 57  | FOLFOX                |
| MCA 8   | famale | 68  | FOLFOX                |
| MCA 9   | famale | 66  | NULL                  |
| MCA 10  | famale | 64  | capecitabine (Xeloda) |
| MCA 11  | famale | 59  | capecitabine (Xeloda) |
| MCA 12  | famale | 67  | FOLFOX                |
| MCA 13  | male   | 53  | FOLFOX                |
| MCA 14  | famale | 50  | capecitabine (Xeloda) |
| MCA 15  | male   | 59  | NULL                  |
| MCA 16  | male   | 78  | NULL                  |
| MCA 17  | male   | 56  | NULL                  |
| MCA 18  | male   | 55  | FOLFOX                |
| MCA 19  | famale | 79  | capecitabine (Xeloda) |
| MCA 20  | famale | 79  | NULL                  |
| MCA 21  | male   | 70  | NULL                  |
| MCA 22  | famale | 52  | Oxaliplatin           |
| MCA 23  | male   | 51  | FOLFOX                |

**Supplementary Table 9. Ct value from q-pcr in 23 clinical samples.**

|        | <b>IZUMO2</b> | <b>MAGEA1</b> | <b>NOVA1</b> | <b>POU4F1</b> | <b>SLCO4C1</b> | <b>Gapdh</b> |
|--------|---------------|---------------|--------------|---------------|----------------|--------------|
| MCA 1  | 21.2807       | 18.8851       | 22.2272      | 20.92933      | 15.99579       | 21.73122     |
| MCA 2  | 24.74783      | 23.8481       | 24.07526     | 23.5759       | 20.77292       | 22.97907     |
| MCA 3  | 20.47353      | 19.7904       | 20.36304     | 21.20656      | 13.98269       | 22.05626     |
| MCA 4  | 21.66257      | 19.0181       | 16.91892     | 22.44433      | 16.9999        | 19.23123     |
| MCA 5  | 22.17938      | 21.66666      | 23.48081     | 22.61432      | 15.41321       | 24.69027     |
| MCA 6  | 23.4627       | 19.10828      | 23.46263     | 21.44453      | 21.0001        | 21.2314      |
| MCA 7  | 20.86937      | 20.36985      | 23.26934     | 22.77899      | 14.1883        | 24.23537     |
| MCA 8  | 20.18949      | 19.89247      | 21.73698     | 21.63366      | 16.36054       | 18.74711     |
| MCA 9  | 16.31971      | 17.86882      | 22.99384     | 21.23036      | 11.99153       | 19.45321     |
| MCA 10 | 20.97392      | 18.9877       | 19.52654     | 19.97768      | 15.83085       | 20.42057     |
| MCA 11 | 18.06733      | 19.49522      | 24.47073     | 22.69279      | 15.3938        | 22.42538     |
| MCA 12 | 18.96714      | 19.35577      | 22.27516     | 22.14325      | 18.06514       | 21.05424     |
| MCA 13 | 19.73353      | 18.68184      | 19.04233     | 19.25841      | 15.81936       | 18.69569     |
| MCA 14 | 17.97098      | 18.05894      | 20.50971     | 19.97168      | 11.27671       | 21.31431     |
| MCA 15 | 22.69149      | 22.6906       | 23.95446     | 24.08643      | 18.82267       | 20.59124     |
| MCA 16 | 15.73483      | 16.96355      | 21.87625     | 20.01548      | 11.75069       | 18.21312     |
| MCA 17 | 19.919        | 18.19356      | 18.4443      | 18.84975      | 14.586         | 19.13123     |
| MCA 18 | 15.96251      | 17.81798      | 23.04227     | 21.00624      | 13.92239       | 20.23101     |
| MCA 19 | 19.25487      | 19.81127      | 22.45747     | 22.4641       | 19.03538       | 21.23134     |
| MCA 20 | 17.13829      | 18.34815      | 23.40846     | 21.53818      | 14.57399       | 21.26089     |
| MCA 21 | 20.52018      | 20.57807      | 24.27254     | 24.29998      | 19.98587       | 22.23132     |
| MCA 22 | 21.24378      | 18.24666      | 20.46705     | 20.39868      | 17.87598       | 21.44672     |
| MCA 23 | 18.54152      | 23.53904      | 24.21647     | 23.83018      | 18.53573       | 23.88021     |
