# Supplementary material for: Analysis of DNA methylation-driven genes for predicting the prognosis of patients with colorectal cancer
Source: Aging (Albany NY). 2020 Nov 16;12(22):22814–39. doi: 10.18632/aging.103949 (PMC7746389; doi:10.18632/aging.103949)
Supplement: Supplementary Table 1 [file aging-12-103949-s002..csv]

Supplementary Table 1. Differential expression genes in colorectal cancer tissue.
	logFC	logCPM	F	PValue
A2M-AS1	-1.7307859	-0.762129553	152.4401729	8.73E-32
A2ML1	4.17390565	0.321128786	36.65333165	2.32E-09
AADAC	-2.165111493	0.633976228	46.71563724	1.81E-11
AADACL2	-3.85342422	-3.098646656	274.8304227	3.28E-52
AANAT	1.500809661	-1.887022981	34.34747926	7.14E-09
AARD	-2.481870525	-1.818205356	175.3363792	7.92E-36
ABALON	1.913807521	0.47114322	157.8957301	9.28E-33
ABCA12	3.617187433	1.197034646	46.61255718	1.90E-11
ABCA17P	2.618124853	-0.336408282	35.95623652	3.25E-09
ABCA6	-2.335185574	0.862796786	136.1500347	7.71E-29
ABCA8	-4.44068923	2.2999522	551.9789436	3.79E-90
ABCA9	-2.94305409	0.52525859	247.2328767	7.62E-48
ABCA9-AS1	3.794655862	-1.80707289	57.84105532	9.32E-14
ABCB1	-1.716881961	5.566544544	75.73193999	2.37E-17
ABCB11	-4.530022613	-0.647779302	433.8592162	3.86E-75
ABCB5	-3.190499124	-1.820577125	156.4800471	1.66E-32
ABCC13	-3.242838891	0.604265415	326.5016375	4.70E-60
ABCC2	2.15463848	2.924156258	34.45963506	6.76E-09
ABCC8	-2.082702637	-1.089665262	85.51288001	2.82E-19
ABCD2	-1.916707409	-0.558738579	107.1839351	1.90E-23
ABCG2	-4.633930181	3.184211983	885.5436321	7.48E-126
ABCG5	-1.783863392	0.131358791	53.35481882	7.70E-13
ABCG8	-1.822675881	-0.273371204	38.41686787	9.83E-10
ABHD3	-1.878280043	5.306786345	394.306948	9.30E-70
ABI3BP	-3.178257873	3.342175109	409.7917841	6.89E-72
ACAA2	-1.610937034	7.055789973	267.083017	5.36E-51
ACACB	-1.759398535	4.531061191	328.8293197	2.13E-60
ACADS	-2.076996788	6.052249386	376.3561104	3.00E-67
ACAN	3.315960695	3.35617774	224.4162915	3.90E-44
ACBD7	2.109636375	0.211983863	106.5400554	2.52E-23
ACKR1	-2.162792345	3.078940307	106.8901921	2.16E-23
ACKR2	-2.258429873	0.309187876	241.9742382	5.35E-47
ACMSD	2.049956391	-1.902252794	21.42293005	4.40E-06
ACP7	2.735626067	-2.578597241	31.00579523	3.69E-08
ACSL6	4.354970624	4.633699582	98.57839358	8.32E-22
ACSM5	-1.563840977	-0.797993956	26.57451527	3.31E-07
ACTBL2	2.95210053	-2.746306628	37.76289446	1.35E-09
ACTG2	-4.064708455	8.090827135	385.4220362	1.60E-68
ACTL10	1.805712015	3.197658052	94.56253051	4.93E-21
ACTL8	2.562594645	1.603236659	28.05714473	1.59E-07
ADAM12	4.128688187	4.523040098	132.1841423	4.11E-28
ADAM33	-2.084316358	2.047172086	138.2371931	3.21E-29
ADAMDEC1	-3.603582949	5.455765634	611.4159483	3.64E-97
ADAMTS1	-1.98461993	4.757389114	218.6340701	3.51E-43
ADAMTS12	3.458186536	4.487492633	189.5736002	2.75E-38
ADAMTS2	2.461118328	5.590074741	103.7992927	8.36E-23
ADAMTS20	4.291530595	-2.759872604	43.87389361	7.05E-11
ADAMTS6	2.179125453	1.382006193	96.0802691	2.51E-21
ADAMTS8	-2.059922998	1.185617599	138.4359979	2.95E-29
ADAMTS9-AS1	-3.368655856	-0.015408509	185.6537799	1.30E-37
ADAMTS9-AS2	-2.680453826	-1.222788135	172.9751023	2.04E-35
ADAMTSL1	-2.075336824	2.299952361	219.4533788	2.57E-43
ADAMTSL3	-3.252697537	1.945897806	335.7576488	2.04E-61
ADAT2	1.613728637	4.097042883	191.2181955	1.44E-38
ADCY2	-2.177483926	0.709770539	180.071587	1.19E-36
ADCY5	-2.842383439	2.842856606	297.7890911	9.55E-56
ADCYAP1R1	-4.290133619	-0.436810037	404.2027292	4.02E-71
ADGRB3	-3.616634646	-1.032819939	317.4617582	1.04E-58
ADGRD2	1.781441294	-2.467856827	24.64667092	8.69E-07
ADGRF2	1.697743316	-2.07733591	21.88018744	3.49E-06
ADGRL3	-2.43446406	1.406622135	241.8150374	5.68E-47
ADH1A	1.707437601	-0.107986628	7.020629121	0.008242007
ADH1B	-3.846627791	4.312503141	179.7257855	1.37E-36
ADH1C	-3.962029563	5.730520989	329.8522962	1.51E-60
ADH4	1.864309708	1.406929907	14.17199283	0.000181034
ADHFE1	-2.753421648	-0.228754349	444.1417934	1.65E-76
ADIPOQ	-1.858116467	1.419881832	14.49433274	0.000153082
ADRA1A	-2.365072873	-2.400286087	97.93359846	1.11E-21
ADRA2A	-1.637819783	4.030736585	71.75977726	1.46E-16
ADRA2C	2.028731592	2.466367179	38.00249739	1.20E-09
ADRB2	-1.919802308	-0.069103404	153.8496053	4.89E-32
ADRB3	-2.485943124	-2.539429682	104.1883886	7.04E-23
ADTRP	-3.029036862	4.475877972	215.3910047	1.21E-42
AFAP1-AS1	5.687296867	3.42775899	54.17117077	5.24E-13
AFF2	-1.800537028	-1.510528458	62.89901752	8.77E-15
AFF3	-3.088090866	1.007342524	397.0959429	3.83E-70
AFP	4.556072406	-0.774683646	56.21368588	2.00E-13
AGT	2.328779116	5.022876056	85.96291892	2.30E-19
AGTR1	-3.444998954	0.401391285	184.8341507	1.79E-37
AHCY	1.716092455	9.074342571	139.3916681	1.98E-29
AHCYL2	-2.651913825	6.884002334	549.7077215	7.14E-90
AHNAK	-1.663400469	9.108884825	195.5982959	2.58E-39
AHSG	6.67696563	2.441868739	46.27999964	2.22E-11
AICDA	-3.204206232	-2.338071259	154.1548827	4.31E-32
AIRE	2.750976769	-0.242806888	28.84922185	1.07E-07
AJUBA	3.041192243	4.656134432	571.0453701	1.96E-92
AKAP12	-1.766417558	5.008315245	84.10495797	5.32E-19
AKAP14	1.761913706	-2.815137277	26.10934727	4.18E-07
AKAP4	4.996013088	-1.761204523	65.59232293	2.51E-15
AKAP6	-2.172071443	1.866300648	238.7839765	1.76E-46
AKNAD1	1.687895811	-0.967610702	41.8530398	1.86E-10
AKR1B10	-3.034506933	4.683014056	208.7320183	1.57E-41
AKR1C2	-1.505959014	2.043009199	64.27721464	4.62E-15
AKR1C4	5.907433359	0.739333923	104.3307512	6.62E-23
AKR1C8P	3.538585368	-2.583010474	55.87859011	2.34E-13
AKR1E2	1.511659213	1.504172548	44.65316929	4.85E-11
ALB	8.755652273	7.384393848	36.64998557	2.32E-09
ALDH3B2	3.788483471	1.414102849	86.49623659	1.81E-19
ALDH4A1	1.942850291	4.944460279	105.7571112	3.54E-23
ALDOB	-3.082508837	6.173461847	139.2292837	2.12E-29
ALG1L	1.539683285	1.408661066	56.4698678	1.77E-13
ALK	-2.008434402	-1.694133312	43.95854039	6.77E-11
ALKAL1	3.692501353	1.0002789	122.8435273	2.18E-26
ALKAL2	-1.929696109	-0.30338117	105.5481249	3.88E-23
ALMS1-IT1	1.701271967	-0.396681528	52.88154847	9.63E-13
ALOX12P2	2.840814501	-0.692989642	34.8686746	5.53E-09
ALOXE3	2.844843368	-1.564217323	61.32167056	1.83E-14
ALPI	-4.274759883	2.590201377	476.8732442	8.82E-81
ALPK3	1.63968651	4.421718794	27.61473234	1.98E-07
ALPP	2.174119494	-0.240417601	18.66702155	1.79E-05
ALX1	2.829373107	-2.197856314	26.42393454	3.57E-07
AMBP	4.559208081	3.27671609	45.3023834	3.55E-11
AMELX	5.097839858	-1.238016767	114.2705229	8.72E-25
AMELY	4.564159793	-2.056360485	113.852447	1.05E-24
AMH	4.154748792	1.92057807	83.83222861	6.01E-19
AMOTL1	-1.924970485	4.235396471	160.6089084	3.06E-33
AMPD1	-3.952264767	-0.416578712	428.2387417	2.19E-74
ANGPT1	-1.53471462	1.562121782	96.72112542	1.89E-21
ANGPT2	1.518714302	3.099311747	108.1501842	1.25E-23
ANGPTL1	-4.060879496	1.927253577	310.8277614	1.02E-57
ANGPTL5	-3.41182791	-3.056758293	316.5227927	1.43E-58
ANGPTL7	-4.291780968	-0.661108728	294.0434483	3.56E-55
ANK2	-3.190496283	2.78061509	411.9221903	3.53E-72
ANK3	-1.694092351	4.694091735	363.3452575	2.10E-65
ANKRD1	2.539454893	-2.008467943	33.52190843	1.07E-08
ANKRD13B	2.483146217	4.246081055	211.6528151	5.09E-42
ANKRD18A	1.520216938	1.174770791	45.48518107	3.25E-11
ANKRD18B	3.217641346	-1.418257113	42.0546965	1.69E-10
ANKRD33	2.780435466	-2.608415929	48.43466816	7.95E-12
ANKRD33B	-1.861158519	0.910290243	157.9834888	8.96E-33
ANKRD35	-1.883991817	0.217936044	205.8951191	4.69E-41
ANKRD36BP2	-1.627490528	1.138718273	44.47934209	5.27E-11
ANKRD36C	1.843416739	1.72848107	30.97348349	3.75E-08
ANKRD40CL	-1.505875487	3.773283058	112.4629023	1.91E-24
ANKRD65	-1.565159563	0.966051867	92.2904413	1.36E-20
ANKS1B	-3.053417872	-1.185254708	258.0755812	1.42E-49
ANLN	2.099493135	5.866999378	248.1862398	5.36E-48
ANO3	-1.66923958	-2.004068795	30.8573432	3.97E-08
ANO5	-3.111038099	1.315895751	204.9531591	6.75E-41
ANOS1	2.921662088	3.205011825	107.479577	1.67E-23
ANP32C	1.565454588	-3.016399771	25.79664426	4.89E-07
ANPEP	-3.799620009	7.855827646	266.092312	7.67E-51
ANXA10	4.57400007	1.254612857	35.24539655	4.60E-09
ANXA3	1.660265913	6.700126908	124.673062	9.98E-27
ANXA8	2.793877656	-1.387983784	21.66355574	3.90E-06
ANXA8L1	-1.639879333	-1.249412971	30.97675908	3.74E-08
AOAH-IT1	2.079111752	-2.446962479	29.87910085	6.43E-08
AOC1	-1.737586252	8.083762243	182.1645888	5.18E-37
AOC3	-2.676492436	5.009616337	264.9144635	1.18E-50
AOC4P	-1.584581345	-2.435274348	59.10981391	5.14E-14
APBB1	-1.551094537	3.235941771	132.8847351	3.05E-28
APCDD1	2.55848224	6.756015169	55.91277817	2.31E-13
APELA	2.916057605	-1.283711078	104.5311125	6.06E-23
APLN	3.305915745	3.33754097	220.5077611	1.72E-43
APOA1	-3.624492997	4.284343337	72.26614439	1.16E-16
APOA2	5.318068202	2.832138034	31.99476051	2.26E-08
APOB	-3.868591253	4.487799537	84.22800887	5.03E-19
APOBEC3A	-2.516370524	0.147757793	176.9828984	4.09E-36
APOBEC3A_B	-2.516370524	0.147757793	176.9828984	4.09E-36
APOBEC3B	-1.540069757	3.266833074	131.2990458	5.97E-28
APOBR	-1.70091698	5.857976263	129.3515362	1.36E-27
APOC2	1.668251185	-2.133078658	28.81356861	1.09E-07
APOC3	-2.494500569	2.262540431	22.77282731	2.23E-06
APOH	3.483679273	2.927024093	22.6016839	2.43E-06
APPL2	-1.780163703	6.069688625	817.8595326	2.90E-119
AQP2	2.94373327	-2.93782912	45.96395947	2.59E-11
AQP5	5.65239673	2.461770357	51.5463303	1.81E-12
AQP6	1.913862158	-0.842445781	47.75070579	1.10E-11
AQP7	-1.875912941	1.816332345	148.7505946	4.01E-31
AQP8	-6.848878835	6.496899074	688.3914622	8.61E-106
AQP9	2.399430434	2.691830197	40.21631753	4.11E-10
AR	-1.723252547	1.261364426	66.31070043	1.80E-15
ARAP1-AS2	1.578296594	-1.353559359	28.18125982	1.49E-07
AREG	1.839381721	6.673154529	52.81377643	9.95E-13
ARG1	1.503819603	-0.498426226	11.29732491	0.000818949
ARHGAP20	-2.544166801	0.345374369	245.6623189	1.36E-47
ARHGAP40	4.935226273	-1.186666395	66.73224248	1.48E-15
ARHGAP44	-2.13705397	4.537780153	280.032073	5.10E-53
ARHGEF25	-2.434651238	3.000850262	324.2027335	1.03E-59
ARHGEF26	-1.832762106	2.644763619	215.575653	1.13E-42
ARHGEF26-AS1	-1.924626881	-1.901425741	59.23945686	4.84E-14
ARHGEF37	-1.544177959	3.805898365	231.9886224	2.24E-45
ARHGEF38-IT1	2.32996481	-1.76105351	42.71402307	1.23E-10
ARID3A	2.3232477	5.706689262	121.8231414	3.38E-26
ARL14	-2.454261837	3.476325741	372.3810639	1.09E-66
ARL4D	-2.275522158	1.737291693	274.1815527	4.15E-52
ARMC3	2.917996713	-1.759103166	39.61944182	5.48E-10
ARMCX1	-1.949562493	2.221070991	235.0105466	7.19E-46
ARNTL2	2.290923993	4.778209591	195.9287186	2.27E-39
ARPIN-AP3S2	-1.546684714	-1.911230186	84.16726064	5.17E-19
ARPP21	-3.130935894	-3.051202985	182.3720567	4.77E-37
ARRDC4	-1.649788172	5.031072206	271.4523309	1.11E-51
ARSH	1.774209633	-1.808396841	35.23718959	4.62E-09
ASAP1-IT2	2.467148373	-2.191381167	30.42600747	4.91E-08
ASAP3	-1.806913891	3.853186747	318.2563351	7.89E-59
ASB2	-2.9330804	2.68877289	371.6443485	1.39E-66
ASB4	2.334707234	-0.300706085	27.1951625	2.43E-07
ASB5	-4.667212759	-0.598448678	286.0946084	5.90E-54
ASB9	2.178672912	3.195117344	103.2120258	1.08E-22
ASCL1	-1.501786979	-2.895406016	28.12945782	1.53E-07
ASCL2	4.154548172	7.024858993	178.1708759	2.55E-36
ASCL5	4.108816765	0.799954874	139.343844	2.02E-29
ASGR1	2.862652939	2.513856505	81.88835624	1.45E-18
ASIC1	1.798315668	4.247393476	111.721778	2.63E-24
ASIC4	1.761363745	-2.286943833	31.79695274	2.50E-08
ASPA	-3.90593489	0.026754653	671.7379019	5.75E-104
ASPG	-2.72191639	1.451896728	161.7792227	1.90E-33
ASPHD1	2.460976245	3.261562617	126.9025826	3.86E-27
ASTN1	-3.493306546	-1.582649063	215.9108159	9.94E-43
ASXL3	-2.026861474	0.522846981	92.1301322	1.46E-20
ATAD2	1.638901121	5.766244192	164.6091666	6.01E-34
ATAD3C	2.160410388	1.840501652	55.58967233	2.68E-13
ATCAY	-3.155458928	-1.646119663	209.7213184	1.07E-41
ATG9B	3.613844513	2.626960562	208.3098334	1.84E-41
ATP11A	2.276366164	6.617269016	228.4270495	8.55E-45
ATP13A4	-2.422595026	0.472901016	145.2055636	1.75E-30
ATP1A2	-4.991440968	2.433765743	538.1556428	1.82E-88
ATP1B2	-2.35912375	0.161937	261.0579885	4.77E-50
ATP2A1-AS1	1.840086976	-0.239897655	76.52954029	1.65E-17
ATP2A3	-1.562195471	7.237273159	110.2544812	4.98E-24
ATP2B3	-2.575213761	-2.461960091	92.02390996	1.53E-20
ATP2B4	-2.202012775	6.20974791	348.4491805	2.90E-63
ATP6V0A4	3.9635122	-1.502128791	53.81416174	6.20E-13
ATP6V0D2	-2.196773936	0.60695617	191.4372902	1.32E-38
ATP6V1B1	2.075367118	-0.729665151	43.73245201	7.54E-11
ATP6V1C2	2.428157758	3.182077492	131.4938832	5.50E-28
ATP6V1FNB	2.298217537	2.312465222	137.887474	3.72E-29
ATP6V1G2	-2.45458267	-1.059670969	402.0233033	8.00E-71
ATP8A2	-1.817352977	-0.425327718	164.8997638	5.34E-34
ATP8B1	-1.627901263	7.609455588	339.782696	5.27E-62
ATRNL1	-2.933560316	-0.242754748	185.3734843	1.45E-37
AUNIP	2.236574414	2.53270653	273.6096326	5.09E-52
AURKA	1.601531065	5.748860301	186.5852319	8.97E-38
AXIN2	2.568577296	7.313658057	135.1938719	1.15E-28
AZGP1	3.294812947	6.305884856	154.6747789	3.48E-32
AZGP1P1	2.784463954	-1.213468832	57.7754041	9.61E-14
B3GALT1	-3.226118791	1.502083881	204.4082126	8.34E-41
B3GALT5	-2.57545195	5.426486437	145.585236	1.49E-30
B3GALT5-AS1	-3.923163786	0.812075144	240.6503053	8.76E-47
B3GNT6	-1.727109912	4.267606446	25.9149711	4.61E-07
B3GNT7	-3.055286951	5.987057179	210.6187366	7.57E-42
B3GNTL1	1.61219085	2.97599989	228.5463879	8.17E-45
B4GALNT2	-4.142173854	4.39641541	209.8133672	1.03E-41
B4GALNT4	2.814591196	3.575637693	49.01201581	6.04E-12
B4GALT1-AS1	-1.684026112	0.260968658	279.4636303	6.25E-53
BAALC	-2.335315933	-0.414986932	204.181079	9.11E-41
BAAT	5.093481796	0.713263393	59.41449297	4.46E-14
BACH2	-1.512966117	0.915504082	62.8715958	8.89E-15
BAMBI	1.773253255	4.548220847	46.41053164	2.09E-11
BARX1	1.877070988	-0.397892726	15.6827707	8.27E-05
BARX2	-1.813153326	3.005661013	71.98793458	1.32E-16
BBOX1	2.372275694	-1.428862263	22.46238507	2.60E-06
BBOX1-AS1	4.737173941	1.450108626	147.5646398	6.55E-31
BCAS1	-2.437601226	5.774373629	221.0729954	1.39E-43
BCHE	-4.252817472	1.176514075	371.8338553	1.30E-66
BCL2	-1.628313746	3.389408731	164.8920285	5.36E-34
BDKRB1	-1.567204299	1.02372926	148.4647365	4.51E-31
BEAN1	2.192935771	0.468181518	47.08624963	1.51E-11
BEND4	-2.537187063	-1.662546341	159.0666742	5.75E-33
BEND5	-2.53028127	-0.370768805	288.9461814	2.15E-54
BEST2	-3.572501467	2.467524797	189.2218762	3.16E-38
BEST3	4.251400128	-0.588808835	57.69946528	9.96E-14
BEST4	-5.773573598	2.952538294	1602.064805	4.38E-182
BEX1	-2.718230316	-0.880938056	130.5898165	8.06E-28
BEX4	-1.778238359	3.225222583	121.8670821	3.31E-26
BFSP1	1.908203461	1.696807782	121.1607264	4.48E-26
BFSP2	-1.66826083	-2.322039261	62.32835981	1.14E-14
BGN	2.630849337	8.066801015	113.0152641	1.50E-24
BHLHA9	5.096734365	-1.889706274	66.33037314	1.79E-15
BHMT2	-1.717205427	0.410499829	54.32550262	4.87E-13
BIRC7	2.422365832	0.048600494	50.61875625	2.81E-12
BLK	-2.479454262	0.328367998	122.2524681	2.81E-26
BLOC1S5-TXNDC5	-1.690558054	-2.496343504	65.78005622	2.30E-15
BMP2	-1.875864214	4.380294662	233.4975234	1.27E-45
BMP3	-5.180713483	2.727347487	587.5434329	2.19E-94
BMP4	2.00438811	6.366931854	88.83063817	6.36E-20
BMP5	-2.548803322	1.466792742	159.2854421	5.26E-33
BMP6	-1.86473025	1.232733549	141.3952722	8.55E-30
BMP7	3.254090486	5.497266546	81.47004051	1.75E-18
BMX	-2.031590523	1.169280692	118.4378166	1.44E-25
BNC2	-1.643182857	2.642338638	71.68392134	1.51E-16
BOC	-1.519491952	3.198723487	69.3453869	4.44E-16
BOP1	2.043003944	7.122604295	149.2810631	3.22E-31
BPIFB1	3.072884104	-1.767771979	24.33654548	1.01E-06
BPIFB2	3.576588043	-2.155558472	32.94770752	1.42E-08
BRCA2	2.069567217	4.128447296	163.5626664	9.19E-34
BRINP3	-3.279554726	1.041285695	105.3646357	4.21E-23
BRSK2	2.795556584	2.774609657	61.23920312	1.90E-14
BTBD16	3.552973207	0.446877934	180.9366459	8.45E-37
BTK	-1.54327379	2.100783082	112.0253554	2.31E-24
BTLA	-1.74239122	-0.384180116	102.6364262	1.39E-22
BTN1A1	2.046401766	-0.241496251	28.85200002	1.07E-07
BTNL3	-2.629365038	4.181152546	213.6655934	2.35E-42
BTNL8	-3.161898977	4.013752687	275.0171534	3.07E-52
BVES	-2.834407296	1.521361778	368.6966814	3.63E-66
BVES-AS1	-3.451796225	-2.729205704	310.8416737	1.01E-57
BYSL	1.60819741	5.146263895	262.0567703	3.32E-50
C10orf55	1.918201471	-0.636065898	91.72163834	1.75E-20
C10orf99	-1.820306478	6.578771386	72.66944583	9.63E-17
C11orf86	-3.681456386	2.484519165	244.4179795	2.16E-47
C11orf87	1.55594	-2.894794895	18.26152965	2.20E-05
C14orf132	-2.032541816	2.706292196	180.7335253	9.16E-37
C14orf180	-2.849907661	-2.360502096	93.56785342	7.68E-21
C15orf48	-2.424050674	7.288360935	286.609619	4.92E-54
C16orf89	-3.535734068	0.662160988	333.5079625	4.37E-61
C17orf53	1.522758171	2.940240269	187.9397555	5.25E-38
C17orf77	3.730850519	1.397373833	48.04716163	9.57E-12
C17orf78	-1.610081366	0.920219363	15.46818316	9.24E-05
C17orf82	1.577343023	-1.535622722	38.9775528	7.49E-10
C17orf99	2.058812881	-1.599001321	37.40852823	1.60E-09
C19orf48	1.966400105	6.938533515	171.2092382	4.16E-35
C19orf81	2.835553583	-2.375332205	39.55150538	5.67E-10
C1orf105	3.12085552	-0.983883189	68.37135185	6.95E-16
C1orf115	-2.312929	5.208021693	409.4194506	7.75E-72
C1orf210	-1.521294264	4.76005868	295.2963088	2.29E-55
C1QL4	1.882888307	-2.667099416	25.17625917	6.66E-07
C1QTNF2	-1.641843091	0.542710367	187.8907345	5.35E-38
C1QTNF7	-2.698093209	0.884423741	199.3852436	5.88E-40
C1QTNF9	-2.695179083	-2.233135484	234.513465	8.67E-46
C2	1.702471978	5.906472236	94.87883962	4.29E-21
C2-AS1	3.243878754	-2.026339559	111.9504458	2.38E-24
C20orf144	2.213022023	-1.082865839	129.3591032	1.36E-27
C20orf194	-1.872990522	2.638183562	184.249345	2.26E-37
C20orf204	2.729650309	0.94831825	54.68759717	4.11E-13
C2CD4A	4.331346477	4.734465897	176.1605874	5.69E-36
C2CD4B	2.570065116	3.121602623	58.41757606	7.11E-14
C2orf66	1.526680605	-1.980202293	22.50651287	2.55E-06
C2orf70	3.397437223	2.488309919	213.1637173	2.85E-42
C2orf74	-1.90635065	-1.408878928	134.9179286	1.30E-28
C2orf88	-3.591068425	4.057460496	732.6564418	1.55E-110
C2orf91	1.907393115	-2.50873629	17.75632043	2.84E-05
C3orf36	-2.028318019	4.907910004	270.0978335	1.80E-51
C3orf67	1.913240063	2.15202075	52.26458603	1.29E-12
C3orf85	-1.686785807	1.987112638	61.28368943	1.86E-14
C3P1	6.35428302	-0.878868329	73.45478477	6.72E-17
C4orf19	-1.619441817	4.307995015	288.751177	2.30E-54
C4orf48	2.008907848	4.271038233	43.88740943	7.00E-11
C5orf34	1.572415148	2.11078159	195.4578416	2.73E-39
C5orf38	2.948603175	0.916883713	34.61744596	6.26E-09
C5orf46	5.711532578	-0.717916669	112.0977397	2.24E-24
C6orf15	8.14292545	2.079349436	93.67585698	7.32E-21
C6orf223	4.619965174	5.340376786	309.5523117	1.59E-57
C7	-3.771416432	4.201197654	294.5125474	3.02E-55
C7orf31	-1.618872161	2.540939098	225.3621326	2.72E-44
C8orf34-AS1	2.943062756	-2.49201251	27.17593822	2.46E-07
C8orf49	3.221681711	-3.04603257	35.93083828	3.29E-09
C8orf74	6.067685227	-1.716651908	117.1787744	2.48E-25
C8orf88	-3.173522884	-0.526246872	360.7996686	4.84E-65
C9	5.857920309	1.181208278	40.81638731	3.07E-10
C9orf116	1.804265896	1.199977565	100.8988897	2.99E-22
C9orf163	1.933430604	-0.357001149	95.05070958	3.97E-21
C9orf43	1.530091928	-0.372358377	109.2516289	7.71E-24
C9orf50	2.244209096	-1.409319019	73.93814399	5.39E-17
C9orf57	2.870466702	-3.105726331	53.19523296	8.31E-13
CA1	-6.430850898	6.591480396	511.0286686	4.10E-85
CA10	-2.215771934	-2.239965686	81.99878007	1.38E-18
CA12	-2.248220535	7.215636746	245.6123121	1.39E-47
CA14	-2.115881222	-0.306521059	238.5545785	1.91E-46
CA2	-4.758297336	7.230742153	764.8091813	6.87E-114
CA3-AS1	-3.034583554	-1.029308379	322.4367321	1.88E-59
CA4	-4.695579298	5.603463853	303.4573923	1.32E-56
CA5A	2.21622285	-2.615913545	42.07446585	1.68E-10
CA6	3.5871054	-1.694910044	35.20839675	4.69E-09
CA7	-5.596812735	3.336471604	857.4476593	3.75E-123
CA9	5.557208309	5.664920398	113.4676035	1.23E-24
CABCOCO1	-1.661059512	-1.644022078	68.90610694	5.43E-16
CACNA1E	1.560587003	0.579488797	16.46657135	5.52E-05
CACNA1H	-1.87931657	4.597663185	154.023005	4.55E-32
CACNA2D1	-2.028597479	2.450106013	146.0555062	1.23E-30
CACNG4	3.59303882	2.353383979	47.25063648	1.40E-11
CACNG8	3.578363269	0.175045109	105.2714765	4.38E-23
CAD	1.502606936	6.757949128	213.8064472	2.23E-42
CADM2	-4.485963293	-0.866274717	379.6652049	1.03E-67
CADM3	-4.636667702	1.54043255	506.423234	1.55E-84
CADPS	2.260644108	4.499477875	67.5809549	1.00E-15
CALB1	5.162379784	3.51772745	40.05998374	4.43E-10
CALB2	-1.943335432	2.070607103	53.12381958	8.59E-13
CALCA	5.091666761	1.638631747	50.96146724	2.39E-12
CALCB	4.035226425	2.297470938	23.42809734	1.60E-06
CALD1	-1.871534064	7.844684018	146.6229929	9.69E-31
CALHM3	2.727203359	-1.980271667	36.30257803	2.75E-09
CALML3	2.894900211	0.138841529	41.2114417	2.54E-10
CALML6	1.753086278	-1.796452534	39.23893543	6.60E-10
CALN1	-1.89958245	-2.918772303	61.1853401	1.95E-14
CALY	-2.630915128	-1.517243916	133.9771852	1.93E-28
CAMK2A	-1.746490796	-0.993412625	83.7889345	6.13E-19
CAMKV	4.514026042	0.636286409	72.11268758	1.24E-16
CAMP	-1.544021681	-2.827018077	47.05685741	1.53E-11
CAND2	-2.204113997	0.680895071	338.1745546	9.04E-62
CAP2	-2.353546387	2.527242988	347.9819383	3.38E-63
CAPN12	1.898281679	2.705074649	65.55767634	2.55E-15
CAPN13	-1.713820881	3.340597367	81.73034902	1.55E-18
CAPN14	1.844271356	-0.902901965	24.17736178	1.10E-06
CARD14	2.408262207	2.295902589	149.4036623	3.06E-31
CARMIL3	1.870068316	1.786720635	98.88578703	7.27E-22
CARS-AS1	2.490775433	-2.509325795	36.6613421	2.31E-09
CARTPT	-2.415671287	-0.771635427	58.62905899	6.44E-14
CASC11	2.390650302	-1.262738267	40.27254773	4.00E-10
CASC18	-2.668030003	-2.544853167	177.3624929	3.52E-36
CASC8	2.091572524	1.422569599	44.49455078	5.23E-11
CASP5	-2.060185387	2.923640312	155.5109313	2.47E-32
CASP7	-1.649845768	6.247687352	453.7471465	8.95E-78
CASQ1	-2.41734839	-1.74395702	172.3874519	2.59E-35
CASQ2	-4.224116611	2.11839555	254.6569209	4.95E-49
CASR	-3.296994042	-2.785279242	260.0643989	6.86E-50
CAV1	-2.089837777	5.702783736	254.2298029	5.79E-49
CAVIN2	-3.124738076	3.442910183	497.5022902	2.06E-83
CBARP	2.49769275	0.692356331	84.825517	3.84E-19
CBLIF	3.624078074	1.114879525	56.42265569	1.81E-13
CBLN2	-2.895494012	-0.870768148	270.8383763	1.38E-51
CBX2	3.716178612	4.059066312	271.6510696	1.03E-51
CBX4	1.657616418	5.428464668	223.0060138	6.65E-44
CBX7	-1.795008627	4.435154079	416.21024	9.21E-73
CBX8	1.790519559	4.030019709	326.9289049	4.07E-60
CCAT2	4.377175318	-1.787383712	71.01677361	2.06E-16
CCBE1	-3.787218489	1.163170836	321.4816628	2.61E-59
CCDC113	1.855155094	3.526050401	161.303678	2.31E-33
CCDC114	1.747304402	-0.689317916	48.88764147	6.41E-12
CCDC13	-1.701636948	-1.884226298	186.5980528	8.92E-38
CCDC148	2.165311923	-0.890071422	78.6128149	6.39E-18
CCDC150	2.114626255	1.561702029	149.5257627	2.91E-31
CCDC152	-2.333093236	0.856817315	201.67127	2.41E-40
CCDC155	1.712973782	-3.023133403	17.85321809	2.71E-05
CCDC158	-2.031006134	-1.528244953	152.7040071	7.83E-32
CCDC169	-1.520410196	-1.575564798	22.91331495	2.07E-06
CCDC178	-1.838474293	-2.564840516	79.21917823	4.85E-18
CCDC187	2.775742185	-0.002314083	57.25047785	1.23E-13
CCDC190	3.201274569	-1.28455402	24.62338815	8.79E-07
CCDC192	1.894884495	-0.14667466	102.4773298	1.49E-22
CCDC198	6.183373101	-0.746542925	81.47021326	1.75E-18
CCDC33	1.697634763	-2.288891614	28.05213775	1.59E-07
CCDC68	-2.112703953	3.885999582	257.3357366	1.86E-49
CCDC69	-2.951037415	4.752993301	666.0764638	2.43E-103
CCDC78	3.673779025	1.89578738	171.1133601	4.32E-35
CCDC80	-1.752494298	5.834926211	76.85920855	1.42E-17
CCDC85A	-1.515817843	-1.398515436	50.76612747	2.62E-12
CCDC85B	1.942936866	5.343602562	73.6721059	6.08E-17
CCL13	-2.366035021	1.622272753	99.00069088	6.91E-22
CCL14	-2.209364324	-0.083313146	256.3528558	2.66E-49
CCL19	-2.305843786	2.228830874	87.02701455	1.43E-19
CCL20	1.678475356	5.992117857	42.52229054	1.35E-10
CCL21	-2.145226576	4.301638195	98.12824893	1.02E-21
CCL23	-3.234684202	-0.955105175	358.4600149	1.05E-64
CCL24	1.890333269	5.300565748	46.56664421	1.94E-11
CCL26	2.133227587	0.08798256	41.31005102	2.42E-10
CCL28	-2.089895975	5.134629697	159.7379425	4.37E-33
CCL8	-2.331706756	1.150195645	115.0679254	6.18E-25
CCN4	2.609535593	3.044399032	122.8331297	2.19E-26
CCN5	-3.630493934	0.950579463	242.9269883	3.76E-47
CCN6	4.387490931	1.5113356	64.79753168	3.63E-15
CCNA1	-1.553872963	-2.702520459	41.78945414	1.92E-10
CCNB1	1.50631545	6.501055717	139.8308818	1.64E-29
CCND1	1.722626761	7.894109176	248.5864612	4.62E-48
CCNE1	1.694692333	3.824276788	141.9533976	6.77E-30
CCNF	1.525670712	5.155210306	191.917061	1.09E-38
CCNJL	-1.520334419	3.469847664	112.3227036	2.03E-24
CCNO	3.103344731	3.379188977	203.7707703	1.07E-40
CCR10	-1.776793036	-0.287763014	118.8610861	1.20E-25
CCR2	-2.1057864	1.326269978	143.4898556	3.57E-30
CCR8	2.070373897	-1.016744645	62.85576494	8.95E-15
CCR9	-1.534531489	-1.828683812	52.19513351	1.33E-12
CD160	-2.164187422	-0.538644528	184.0358283	2.46E-37
CD163L1	-2.850430928	3.120815045	435.3647859	2.43E-75
CD177	-5.142652636	5.962320129	381.9234468	4.95E-68
CD180	-1.644482145	1.849706147	118.0870562	1.68E-25
CD19	-2.072068848	0.869406666	120.9469486	4.91E-26
CD1C	-1.754633024	0.490182936	112.4460362	1.92E-24
CD1D	-1.651281007	1.577712466	192.5441104	8.55E-39
CD200R1L	4.463677329	-2.132951301	48.82167461	6.61E-12
CD209	-2.265756722	2.96520952	200.101793	4.45E-40
CD22	-2.550471619	1.958825584	152.4670951	8.64E-32
CD27	-1.826273224	1.968100223	131.8386039	4.75E-28
CD300LD	2.409853417	-3.044829977	34.65522561	6.14E-09
CD300LG	-2.735761119	-1.528669066	87.17782377	1.33E-19
CD36	-2.459543429	3.522372897	184.6086393	1.96E-37
CD3EAP	1.862931321	3.243032768	270.214801	1.73E-51
CD48	-1.824261011	3.268333534	151.6984976	1.19E-31
CD70	2.025751398	1.351593567	31.84089643	2.44E-08
CD79A	-2.446510881	3.531190469	139.1892651	2.15E-29
CD79B	-2.223081925	1.893537562	181.5704993	6.56E-37
CDC14A	-1.893112915	2.908126107	437.342782	1.32E-75
CDC25B	2.288517044	7.425750533	247.6534011	6.52E-48
CDC45	1.713694243	4.508949957	161.2168352	2.39E-33
CDC6	1.714719088	5.377196871	138.4221215	2.97E-29
CDCA3	1.590490968	4.740674707	180.8917285	8.60E-37
CDCA5	1.552414985	5.602595438	184.8717338	1.77E-37
CDCA7	1.741242384	7.297618445	167.5461165	1.83E-34
CDH10	-3.791917546	-3.261600212	350.8391093	1.31E-63
CDH11	1.571219389	5.75107781	62.44761884	1.08E-14
CDH15	1.573278645	-1.442376495	35.43502069	4.20E-09
CDH16	2.300176778	1.47894289	18.7598193	1.70E-05
CDH19	-4.232753269	0.337602395	296.1518954	1.70E-55
CDH3	5.8088977	6.602471987	729.204027	3.60E-110
CDH7	1.890483293	-1.539263334	18.53431216	1.91E-05
CDH9	1.661281647	-2.675730591	10.0419868	0.001597656
CDHR2	-2.103936969	5.930309764	128.3876183	2.05E-27
CDHR5	-2.279854214	7.365702982	259.6132316	8.08E-50
CDIPTOSP	2.918055786	-1.875394273	59.87353699	3.60E-14
CDK1	1.517806667	6.00950641	129.6977762	1.18E-27
CDK15	-1.592546203	-1.724661219	52.60095828	1.10E-12
CDKL1	-1.739299449	1.066769707	342.5760056	2.06E-62
CDKL2	-1.859133464	-0.787522437	113.4806876	1.23E-24
CDKN2A	3.006222137	3.330518004	81.86014691	1.47E-18
CDKN2B	-3.150195669	4.637074724	671.6701629	5.85E-104
CDKN2B-AS1	-4.869621137	2.421454452	539.766269	1.15E-88
CDON	-1.550617047	2.468846153	144.7316629	2.13E-30
CDSN	1.637514219	-2.888238824	28.27360997	1.42E-07
CDT1	1.628800944	5.824855471	104.8151152	5.35E-23
CEACAM1	-2.187211147	8.200629371	348.4854589	2.86E-63
CEACAM20	-4.402235863	-1.76471907	335.4822472	2.24E-61
CEACAM7	-4.098003677	8.55393703	352.6345284	7.20E-64
CEBPB	1.61167219	6.080891987	131.2364097	6.13E-28
CECR2	1.897332124	1.285822252	23.66799001	1.42E-06
CEL	6.138411943	5.369053655	98.47197016	8.72E-22
CELA3B	-2.495892994	-2.289650232	84.17672704	5.15E-19
CELF4	-2.525335661	-1.603676851	143.0147526	4.35E-30
CELP	2.212894821	2.622036213	32.42161204	1.84E-08
CELSR1	2.340581518	5.468024966	179.9863108	1.23E-36
CELSR3	2.821559791	4.588029023	189.7930115	2.53E-38
CEMIP	5.260557172	7.212674677	405.5299293	2.64E-71
CEND1	-2.270031563	-1.24356377	204.5320945	7.95E-41
CENPI	1.609507573	3.137921183	174.3259847	1.19E-35
CEP55	1.61483541	5.345611014	163.6521333	8.86E-34
CEP72	2.073908684	3.501502078	273.5140741	5.27E-52
CES2	-1.963779384	8.016255326	203.7795724	1.06E-40
CES3	-2.12589098	5.650475526	173.3108522	1.79E-35
CFAP157	2.026125423	1.8341814	250.6579292	2.15E-48
CFAP161	1.620839081	-2.208598901	33.63594437	1.01E-08
CFAP45	2.157849321	0.103677894	124.0536316	1.30E-26
CFAP46	1.562449156	-1.207755658	16.84678781	4.54E-05
CFAP47	2.528750717	-2.57970905	32.63446775	1.65E-08
CFAP73	1.541212939	-0.793170771	45.50470777	3.22E-11
CFAP74	2.007950289	-0.627606033	43.03563465	1.05E-10
CFD	-2.293963903	5.043634406	126.1891071	5.23E-27
CFL2	-2.672366473	3.965926384	472.0124299	3.74E-80
CFP	-1.703456207	1.196287051	157.4965583	1.09E-32
CGREF1	3.506588726	4.836265502	278.0862764	1.02E-52
CHAC1	1.744591183	3.377839095	84.94968962	3.63E-19
CHAD	-2.709348936	0.845671573	271.6617506	1.03E-51
CHAT	-4.462807431	-2.966426178	497.6480918	1.97E-83
CHGA	-4.427064191	5.112501982	263.5034974	1.96E-50
CHGB	-1.579433	2.752295023	19.26026152	1.32E-05
CHI3L1	2.940742812	5.005129287	99.12000255	6.55E-22
CHL1	-2.611769756	2.051391538	225.5116959	2.57E-44
CHODL	-3.062231144	-0.415741466	253.7764397	6.84E-49
CHP2	-3.860685092	5.602718306	356.1906317	2.22E-64
CHPF	1.817711699	7.472731958	154.0506593	4.50E-32
CHRDL1	-3.119570207	3.685934618	166.6422286	2.63E-34
CHRM2	-3.688600866	1.326625646	139.0716608	2.26E-29
CHRM4	-2.069776976	-1.427952861	94.07256834	6.13E-21
CHRNA1	-1.699882389	0.385456785	104.8270468	5.32E-23
CHRNA3	-2.02026576	1.431013179	98.33732717	9.26E-22
CHRNA6	2.421693181	-2.572518524	43.64331793	7.87E-11
CHRNB4	-1.645201916	-1.076380966	82.90728997	9.13E-19
CHRND	4.352030304	-2.274616558	45.84939788	2.73E-11
CHRNG	2.018587989	-2.143010199	34.63837178	6.19E-09
CHST4	5.147527354	1.827634716	63.3428208	7.14E-15
CHST5	-2.454288292	2.593384885	104.8565784	5.26E-23
CHST9	-1.867902369	-1.654798117	26.5830066	3.30E-07
CHTF18	1.897277525	5.117564367	142.3944957	5.63E-30
CIB4	1.678113182	-2.491329397	14.07767514	0.00019015
CIDEA	-1.693408581	-1.844745958	18.38149759	2.07E-05
CIDEB	-1.539324024	-2.038927502	55.39616609	2.94E-13
CIDEC	-2.166772399	1.848436578	92.91615368	1.03E-20
CILP	-2.792793148	2.92892727	122.435527	2.60E-26
CILP2	2.727100026	1.041599549	61.40420802	1.76E-14
CITED1	2.721620256	0.737471308	67.05243448	1.28E-15
CITED2	-1.703897471	4.951501847	483.4981589	1.25E-81
CKAP2	1.569945479	5.85951584	177.728394	3.04E-36
CKAP2L	1.515471012	4.026711929	157.6728002	1.02E-32
CKMT2	3.512892794	4.072607322	52.43116637	1.19E-12
CLCA1	-2.475237343	8.613127677	43.06720565	1.04E-10
CLCA4	-5.312441939	6.7952465	329.7734465	1.55E-60
CLCN1	1.716579662	-0.428011338	34.71414338	5.97E-09
CLCN4	1.790597761	3.329892455	72.97335819	8.38E-17
CLCNKB	-3.015681787	-2.228614098	219.8595198	2.20E-43
CLDN1	4.877279339	6.657699806	464.0807995	3.99E-79
CLDN10	2.505984383	0.010027218	18.84938216	1.63E-05
CLDN10-AS1	5.472898975	-1.432435081	88.84291903	6.33E-20
CLDN11	-2.051171886	0.942381372	123.9048853	1.39E-26
CLDN14	3.154167496	0.679074932	81.0911746	2.08E-18
CLDN16	2.908317712	0.076331715	98.41838392	8.93E-22
CLDN18	6.941961845	4.558853402	48.57555367	7.44E-12
CLDN2	5.598449347	7.366725222	135.1282158	1.19E-28
CLDN20	1.662558695	-1.201555999	24.96346626	7.41E-07
CLDN23	-2.908854398	4.668262327	644.483708	6.23E-101
CLDN5	-1.753075108	3.376769732	112.1113208	2.22E-24
CLDN6	3.113594326	-1.117123392	34.96395687	5.28E-09
CLDN8	-5.025706935	2.810762556	253.5599401	7.41E-49
CLDN9	2.667565758	1.185261283	65.1754518	3.05E-15
CLEC10A	-2.760993237	1.974479636	266.4669498	6.70E-51
CLEC17A	-2.329044426	-1.404092131	103.6361381	8.98E-23
CLEC3A	2.073130882	-2.679498315	17.02714263	4.13E-05
CLEC3B	-4.193942905	2.517391064	1286.487372	7.25E-160
CLEC4F	-1.747722963	-2.07728721	63.71523408	6.00E-15
CLEC4G	-2.575172025	-1.235515603	104.4825048	6.19E-23
CLEC5A	3.535796241	1.699146656	104.0307578	7.55E-23
CLEC6A	1.589489805	-2.392078849	20.56011444	6.81E-06
CLEC9A	-2.790410193	-1.710011988	269.547993	2.20E-51
CLECL1	-1.977554285	-1.450106377	128.051587	2.37E-27
CLIC3	2.045998109	3.044855958	47.75361058	1.10E-11
CLIC5	-2.039201603	6.016362432	278.2535588	9.63E-53
CLIP3	-1.952484119	3.668185958	235.4561355	6.09E-46
CLIP4	-2.008722282	2.287556771	148.0939589	5.26E-31
CLLU1	3.485406832	-2.454326741	48.03413996	9.62E-12
CLLU1OS	2.703026763	-1.746401409	39.63727695	5.44E-10
CLMAT3	3.513686058	-1.48991667	51.14330624	2.19E-12
CLMP	-1.960605093	3.80612064	158.1623337	8.32E-33
CLU	-2.202044851	6.449049523	136.4484053	6.80E-29
CLVS2	-2.999857825	-2.17804595	137.3783323	4.60E-29
CMA1	-3.911345289	-1.11332314	273.1596386	5.99E-52
CMAHP	-1.535725565	2.4409086	83.26291127	7.78E-19
CMBL	-1.691863639	6.450600956	158.0057958	8.87E-33
CMTM5	-4.650027632	-2.424560891	682.8257303	3.49E-105
CMTM7	1.51329733	4.467168756	122.6310575	2.39E-26
CNDP1	1.805462872	-1.052239611	17.63557784	3.03E-05
CNGA1	-1.526576596	1.889956272	88.5146196	7.33E-20
CNGA3	-2.935898913	-0.223519519	113.0072013	1.51E-24
CNGB1	-3.488283635	-2.270832257	365.1051573	1.18E-65
CNKSR2	-2.124834343	-1.060112568	116.4354527	3.42E-25
CNN1	-4.070555992	6.706725358	412.6394656	2.82E-72
CNNM2	-1.587170373	4.234382429	627.9316178	4.65E-99
CNNM4	-1.568184332	6.528620614	401.4824753	9.50E-71
CNR1	-3.812450319	0.399460979	323.833948	1.17E-59
CNR2	-2.296868813	-1.14869177	123.3097825	1.79E-26
CNTD2	4.911808376	2.434864655	201.006464	3.13E-40
CNTFR	-3.664310594	1.509601186	194.16003	4.54E-39
CNTN1	-2.821600632	0.977169783	137.5996805	4.19E-29
CNTN2	-3.851098963	-0.742398761	325.7528171	6.07E-60
CNTN3	-2.516979698	0.999059512	122.4969955	2.53E-26
CNTN4	-2.433266614	1.597290694	312.2079467	6.33E-58
CNTNAP3	-2.636273737	-1.035017294	175.5734106	7.20E-36
CNTNAP3B	-1.779663268	-1.492227585	53.58960723	6.89E-13
COL10A1	7.857582188	4.723716358	185.8159324	1.22E-37
COL11A1	6.368604891	5.347654045	208.379321	1.80E-41
COL12A1	1.890196461	7.87316004	68.40947219	6.83E-16
COL19A1	-2.652037168	-2.346700217	130.0225517	1.03E-27
COL1A1	2.735172665	11.37333659	100.3963863	3.73E-22
COL1A2	1.600761689	10.70042241	49.09887048	5.80E-12
COL21A1	-2.19431315	0.471283476	177.429958	3.42E-36
COL22A1	1.944272456	0.974386842	45.70468316	2.93E-11
COL26A1	1.649790644	-1.669832262	25.5901917	5.42E-07
COL27A1	2.07239484	4.706867741	89.7999944	4.12E-20
COL2A1	1.596147442	2.159785862	8.762651424	0.003179986
COL4A6	-2.116443882	0.549576312	114.8520567	6.78E-25
COL5A1	1.623746847	8.056490967	62.58102547	1.02E-14
COL5A2	1.790523637	7.513163505	68.25935437	7.32E-16
COL6A4P1	2.396648649	-1.761848359	114.6436117	7.42E-25
COL6A5	-2.58158667	-1.592645467	106.951856	2.10E-23
COL6A6	1.766149053	-1.229760606	21.92916493	3.41E-06
COL7A1	3.314809376	5.28561753	159.0795501	5.72E-33
COL8A1	1.782230673	5.385555618	44.47002995	5.29E-11
COL9A1	1.554361309	2.412589637	24.55300919	9.10E-07
COL9A3	3.15796932	4.880733966	66.38399686	1.74E-15
COLEC10	2.237929171	-1.146571213	32.80710251	1.52E-08
COLEC12	-1.746420696	3.003417291	84.48747554	4.48E-19
COMP	6.056632927	4.493431203	116.4318073	3.43E-25
CORIN	3.434856641	1.382244167	130.8186024	7.32E-28
CORO2B	-2.127120613	0.658795411	158.7729	6.48E-33
CORO6	-1.718304629	-0.189732437	136.6182005	6.33E-29
COX7A1	-1.544712538	2.284664982	132.4820131	3.62E-28
CPA3	-1.889727883	3.196483202	98.02444889	1.06E-21
CPA4	3.869862954	-1.035264485	91.55107892	1.89E-20
CPA5	1.570586857	-2.494231362	18.45195694	1.99E-05
CPB1	-2.993471309	-1.08612692	89.41327106	4.90E-20
CPB2	4.753675756	-0.276137388	36.65832664	2.31E-09
CPEB1	-3.270704771	-0.638272199	344.4529164	1.10E-62
CPED1	-2.411572144	3.49664905	283.4760473	1.50E-53
CPLX1	1.721926576	2.980387364	57.52043958	1.08E-13
CPM	-2.519348384	4.46506866	367.0986126	6.12E-66
CPN1	3.810305475	0.222457217	41.94650912	1.78E-10
CPN2	3.384118222	-0.356896841	25.14731233	6.76E-07
CPNE1	1.856956964	7.9291729	124.6429175	1.01E-26
CPNE4	-1.527375526	-1.489004248	26.0955557	4.21E-07
CPNE5	-1.936278615	2.811167239	253.1897659	8.49E-49
CPNE7	5.839698348	5.064867906	279.1062923	7.10E-53
CPNE8	-2.069473238	2.811709745	242.1072797	5.09E-47
CPNE9	1.857885365	-0.632678441	52.8307091	9.87E-13
CPO	-6.010947441	-0.461828314	1143.864778	1.24E-148
CPXM1	1.716792846	3.963115224	67.9194003	8.56E-16
CPXM2	-2.376995335	3.673578951	159.2442052	5.35E-33
CR1	-1.614899344	1.191548406	53.81783956	6.19E-13
CR2	-2.866129441	2.575050726	111.0233841	3.57E-24
CRAT37	5.100085749	-0.737371366	70.20567432	2.99E-16
CREB3L3	-3.556076955	2.069421849	195.0577542	3.19E-39
CREG2	2.488116493	0.434837474	43.83665934	7.18E-11
CRHBP	-2.376454226	-1.964652092	150.3248433	2.09E-31
CRNDE	4.630110611	2.172340176	259.5990152	8.13E-50
CRTAC1	-1.987555886	-0.263031546	59.77086673	3.77E-14
CRYAB	-2.387974557	3.836291695	234.7533297	7.92E-46
CRYBA2	-1.736568064	-0.615489203	38.9916006	7.44E-10
CSAG1	6.789573253	0.630465062	50.32116297	3.24E-12
CSAG2	3.780303922	-3.00476767	37.51998496	1.52E-09
CSAG3	4.477739829	-2.232944537	40.50480918	3.57E-10
CSE1L	1.630664585	7.573139627	250.1033314	2.64E-48
CSF2	3.593394327	-0.344498802	80.79943223	2.37E-18
CSF3	1.827275439	1.707769267	23.32851244	1.68E-06
CSMD2	1.874557388	1.056495399	47.72598058	1.11E-11
CSNK1G2-AS1	1.629488432	-2.430665849	28.5588913	1.24E-07
CSRP1	-2.251008766	8.222082411	668.6470868	1.26E-103
CST1	8.398736593	4.885749561	192.8039151	7.72E-39
CST2	6.314111143	0.946900411	170.9350148	4.65E-35
CST4	6.327142223	-0.716762666	126.2774356	5.03E-27
CST5	4.505031406	-2.229336374	58.68368889	6.28E-14
CST6	4.664892527	1.32062096	49.65657176	4.45E-12
CSTL1	3.195796155	-2.096735316	72.17517028	1.21E-16
CT83	5.168848752	-1.170407583	38.03091653	1.19E-09
CTAG2	5.739249446	-0.758427565	39.17783573	6.79E-10
CTHRC1	3.807975942	4.959763659	179.5422648	1.47E-36
CTNNA3	-3.744783243	-0.819501719	291.8765477	7.63E-55
CTNND2	-3.316163789	-1.279071443	280.60299	4.16E-53
CTSG	-3.307384166	0.568507626	209.7878601	1.04E-41
CTSV	1.515565271	4.103053414	53.71046528	6.51E-13
CTU1	1.898025262	3.17561741	77.9351091	8.69E-18
CUBN	-4.860379537	1.305158173	1275.660271	4.83E-159
CUX2	-1.76332013	-2.156730316	41.41562067	2.30E-10
CWH43	-3.817748892	2.592553301	229.5366472	5.63E-45
CX3CR1	-1.554578176	0.281164665	100.0202708	4.40E-22
CXCL1	2.944604016	6.409348506	119.5657505	8.89E-26
CXCL11	2.588817589	4.009845028	48.28054506	8.56E-12
CXCL12	-2.676531361	5.002623036	389.551562	4.26E-69
CXCL13	-1.870944759	2.879034855	56.13991202	2.07E-13
CXCL17	5.182422448	0.74224341	62.35315381	1.13E-14
CXCL2	2.405975403	4.779166848	90.29282115	3.31E-20
CXCL3	2.966208317	5.611353606	133.5611679	2.29E-28
CXCL5	4.695059521	5.20053706	59.6955339	3.91E-14
CXCL6	2.36741384	1.771359344	49.3675393	5.10E-12
CXCL8	3.64442414	7.002008565	68.70733571	5.95E-16
CXCR5	-2.696788489	-2.154039669	140.0329108	1.51E-29
CYBRD1	-2.051899949	5.682647944	210.5640915	7.73E-42
CYP11A1	-1.751981133	-1.874032825	69.85132432	3.51E-16
CYP19A1	1.946760182	-0.538689177	40.25129938	4.04E-10
CYP1B1-AS1	-1.559647096	-1.035574945	89.00630571	5.88E-20
CYP24A1	2.090486622	0.533138564	22.42895003	2.65E-06
CYP26A1	2.59217355	-1.149273272	37.85977403	1.29E-09
CYP27B1	1.996554199	2.095472951	216.099058	9.25E-43
CYP2B7P	-2.568885201	0.174185239	153.5985233	5.42E-32
CYP2C18	-2.001432086	1.834051363	100.7688168	3.17E-22
CYP2D6	-1.975153233	1.396060968	118.7200226	1.28E-25
CYP2D7	2.67443962	0.770336527	108.2189927	1.21E-23
CYP2E1	3.191351788	2.282819446	30.19481568	5.50E-08
CYP2F1	1.858935974	-1.766412166	44.63308385	4.90E-11
CYP2W1	4.098323774	6.051848907	59.48098772	4.32E-14
CYP3A4	-3.981802814	2.149452724	184.0653148	2.43E-37
CYP4B1	-2.712697187	-0.882135739	184.0404946	2.46E-37
CYP4F29P	-2.261212468	-1.437021788	77.99530376	8.46E-18
CYP4F8	3.240170074	-0.715465938	46.8660193	1.68E-11
CYP4X1	2.969766018	3.494063759	62.41820603	1.10E-14
CYP4Z1	2.50420881	-2.576411913	36.35064831	2.68E-09
CYP8B1	2.533629811	0.114081283	14.33953975	0.000165915
CYS1	-2.133468684	1.526305097	190.6730171	1.79E-38
CYSLTR1	-1.763238634	0.83140878	160.6199543	3.05E-33
CYSRT1	2.700528803	0.559292036	134.7110018	1.41E-28
DAAM2	-1.866670575	3.242111429	259.857326	7.40E-50
DACH1	2.230088183	5.243571119	95.33507429	3.50E-21
DACT3	-2.520179498	2.507443363	285.4253689	7.48E-54
DAND5	-2.998011231	-1.840274757	280.9943828	3.62E-53
DAO	-4.701162512	-0.979225174	395.8228378	5.74E-70
DAPL1	1.758291171	-0.139213429	21.69056519	3.84E-06
DAW1	2.30593954	-2.76628963	28.60667214	1.21E-07
DBET	2.423386209	-1.943883631	27.52556153	2.06E-07
DBNDD1	2.545689459	4.669908221	201.4505943	2.63E-40
DBX1	1.599496471	-3.023959591	17.19900177	3.79E-05
DCAF4L1	1.549421067	-1.418431887	52.4490333	1.18E-12
DCDC1	1.941625648	-2.544036518	26.23478418	3.93E-07
DCDC2	1.588517892	2.202720791	18.11791596	2.36E-05
DCLK1	-2.803550471	1.408973395	241.5351014	6.30E-47
DCN	-1.813973593	7.812155087	125.0565858	8.47E-27
DCSTAMP	2.967345931	-1.021530198	56.57076369	1.69E-13
DCT	1.644265599	-0.611119258	10.54641801	0.001220462
DDC-AS1	2.561857601	-2.828632068	38.67017499	8.69E-10
DDIAS	1.956275133	3.344974181	194.3794186	4.16E-39
DDIT4	1.542335445	6.524674154	88.63405455	6.95E-20
DDN	4.582774763	1.825241685	285.3317297	7.74E-54
DDN-AS1	3.273690892	0.282235228	198.4720263	8.39E-40
DDR2	-1.96008566	4.838810026	129.7294152	1.16E-27
DDX11-AS1	1.628065972	-0.00946968	136.7659768	5.95E-29
DEFB1	-1.86294799	2.041734397	64.17773914	4.84E-15
DENND5B-AS1	1.550396101	-2.495400627	21.51192949	4.21E-06
DES	-3.680474997	8.391183646	174.1845841	1.26E-35
DGAT2	2.073090217	5.100282152	178.8108667	1.97E-36
DHRS11	-2.178200431	5.657435658	378.6338458	1.43E-67
DHRS2	4.883281363	2.707375315	87.71040405	1.05E-19
DHRS7C	-5.003809889	-3.130875873	849.6818597	2.13E-122
DHRS9	-3.285944502	4.757442125	217.4832001	5.45E-43
DIAPH2-AS1	3.11225912	-0.940337197	44.03393958	6.53E-11
DIAPH3	1.668648342	4.321089233	183.5374017	3.00E-37
DIO2	2.125105265	3.560466136	93.60532387	7.55E-21
DIRAS1	-1.823002956	0.104235606	80.00669315	3.39E-18
DIRAS2	-2.163590739	-2.011431053	81.44849116	1.77E-18
DIRC1	3.259493651	-2.963447747	62.93429237	8.63E-15
DISP2	-2.215891073	2.682852818	259.271325	9.16E-50
DIXDC1	-1.699101665	4.028303436	300.2105203	4.09E-56
DKC1	1.539982244	7.293169654	298.1707889	8.36E-56
DKFZP434K028	2.275673163	-1.833592478	39.15220876	6.88E-10
DKK1	3.568354692	1.529151386	40.45804972	3.66E-10
DKK4	8.378090838	2.600124107	97.81604032	1.17E-21
DLEU2	1.531492937	2.372208771	56.11437055	2.10E-13
DLG2	-1.840792097	0.144047073	137.8157111	3.83E-29
DLGAP1-AS5	5.241655512	-0.0768415	42.53122795	1.34E-10
DLGAP2	-1.943435884	-2.818608426	81.67600173	1.59E-18
DLGAP4-AS1	1.730294823	-0.693445436	57.56896979	1.06E-13
DLK1	2.396618697	-1.857186887	15.50138625	9.08E-05
DLL3	2.719323117	-0.572673258	51.97636788	1.48E-12
DLX3	3.256913705	1.052520419	40.48067954	3.62E-10
DLX4	2.489654651	-0.127038555	124.064776	1.29E-26
DLX5	2.604825609	-0.355701269	32.80910613	1.52E-08
DLX6	4.035855369	0.202672268	58.521338	6.77E-14
DMBX1	5.913151792	-0.048613256	129.7662435	1.14E-27
DMD	-2.186935455	4.020687543	186.5671817	9.03E-38
DMKN	1.757768867	4.218267633	37.63436335	1.44E-09
DMRT1	4.393147051	-1.789606814	41.74046712	1.97E-10
DMRT3	3.984352271	-1.617111707	59.66429069	3.97E-14
DMRTA1	-3.228130056	-0.93132586	220.6728742	1.61E-43
DMRTA2	5.107655547	0.864078047	66.10241824	1.98E-15
DNAAF3	1.999643275	0.119060358	53.19099922	8.32E-13
DNAH12	2.045900059	-1.273285504	52.76539349	1.02E-12
DNAH14	1.934791985	2.845550576	74.15123686	4.88E-17
DNAH2	2.905403852	2.454985518	115.7399259	4.62E-25
DNAH5	2.494608766	0.790822236	93.53338459	7.79E-21
DNAJB5	-2.495333804	2.746029426	369.9551039	2.41E-66
DNASE1L2	2.517898795	0.324243901	105.3382699	4.26E-23
DNASE1L3	-3.209060632	2.381237397	230.145167	4.47E-45
DNER	-2.571331103	-0.115903032	123.9630128	1.35E-26
DNMT3B	1.76728797	2.786007594	133.3865829	2.47E-28
DOCK3	-1.702659241	0.146326225	103.5256622	9.42E-23
DOK7	2.142320872	1.794768616	72.00224803	1.31E-16
DPEP1	2.633428876	8.142954847	45.17356737	3.78E-11
DPEP3	-2.319220081	-2.614995201	117.142731	2.52E-25
DPF1	1.603335579	-0.43497706	57.12735491	1.30E-13
DPF3	-2.259852251	1.103279831	222.6772191	7.54E-44
DPP10	-1.705393558	1.330580329	24.26460637	1.05E-06
DPP10-AS1	-2.229525268	0.114629671	40.33722878	3.88E-10
DPP6	-5.134853683	0.551984513	654.1237682	5.17E-102
DPT	-4.090914268	4.061313441	513.3316212	2.11E-85
DPYD	-1.677700786	3.423986206	102.392489	1.55E-22
DPYSL5	-2.124673568	-1.55306619	52.07348655	1.41E-12
DRD2	3.294293617	2.301725864	44.70983264	4.72E-11
DRD5	-2.628766866	-1.466685563	60.89394585	2.23E-14
DSC2	-1.540344188	6.920505186	235.740097	5.47E-46
DSC3	4.366504136	3.929105117	64.90013551	3.46E-15
DSCAML1	-2.261231563	-0.14570982	103.1196973	1.13E-22
DSCC1	1.91797922	3.948313313	215.4101286	1.20E-42
DSCR8	5.2190028	-1.985451741	42.75590845	1.21E-10
DSCR9	1.792157133	-2.343233179	57.32336115	1.19E-13
DSG1	2.532290097	-0.678926069	73.81916374	5.69E-17
DSG1-AS1	2.422598778	-2.758201438	49.80128952	4.15E-12
DSG3	4.436107357	3.861605534	59.36717726	4.56E-14
DSG4	2.248525392	0.289514238	112.8105605	1.64E-24
DTNA	-1.743199963	2.389540109	73.96161085	5.33E-17
DUOXA2	1.910585485	5.176574797	19.62524642	1.10E-05
DUSP14	1.689279105	3.998573697	220.7035751	1.60E-43
DUSP15	2.485730665	1.712246674	64.3632913	4.44E-15
DUSP26	-2.650869626	-1.137649188	193.5761552	5.70E-39
DUSP27	7.408931278	5.681957467	83.49362115	7.01E-19
DUSP4	3.261513589	5.618220284	88.01989829	9.15E-20
DUSP9	4.368432423	-0.154898793	87.16164723	1.34E-19
DUXAP8	3.785168825	0.974970058	84.02208672	5.52E-19
DYDC2	1.687602974	-1.784114603	12.26116846	0.000492255
DYNC1I1	-2.130982762	0.868235415	100.3253834	3.85E-22
E2F1	1.923893826	5.159380545	183.6687445	2.85E-37
E2F7	1.923920677	3.089162165	173.6786814	1.54E-35
ECEL1	1.936977739	-0.012956547	26.8169222	2.94E-07
ECRG4	-4.187261027	-0.156664487	407.0287605	1.65E-71
ECT2	1.827222618	6.51401058	189.1977304	3.19E-38
EDAR	2.937266259	4.253216227	71.60454844	1.57E-16
EDIL3	-2.102724606	4.797842733	299.6567229	4.97E-56
EDN2	-2.702598335	0.625049473	212.3055334	3.96E-42
EDN3	-3.160434473	3.547983825	298.2822579	8.04E-56
EDNRA	1.902739359	3.845630373	79.99051884	3.42E-18
EFHC2	-2.369049307	-0.63546082	146.5632985	9.93E-31
EFNA3	1.836739953	4.519063852	103.9301903	7.89E-23
EGFL6	3.50094847	1.917156016	207.8150415	2.23E-41
EGOT	2.47876549	-2.158652613	47.8010713	1.08E-11
EGR4	2.210896477	-1.296859793	37.4058131	1.61E-09
EIF3IP1	3.700014307	-2.3352234	51.82582069	1.59E-12
EIF4E3	-1.826235723	4.647701551	284.5373458	1.03E-53
EIF4EBP1	1.56089277	6.069422018	107.1166911	1.96E-23
ELANE	-3.468562877	-2.441759112	372.7318236	9.74E-67
ELAVL3	-3.360111098	-2.549422887	284.8342496	9.23E-54
ELAVL4	-3.294812754	-0.690534992	361.3867449	3.99E-65
ELF5	7.18662628	1.802046332	76.4362882	1.72E-17
ELFN1-AS1	4.981844367	3.208581751	245.7256921	1.33E-47
ELFN2	1.906694644	-0.436890025	25.79962217	4.88E-07
ELOVL4	-1.515931781	-0.299925181	99.39373513	5.81E-22
EME1	1.761345292	2.251828233	208.5225322	1.70E-41
EMILIN3	-2.521410575	-1.052501517	306.2593206	4.97E-57
EML1	-2.335492024	3.386007413	345.3586166	8.13E-63
EML5	-1.505760069	-1.477716838	43.16069022	9.93E-11
EMP1	-1.778553626	7.11533274	192.7313016	7.95E-39
EN1	2.702194754	-2.362538132	29.77512137	6.77E-08
EN2	6.127036128	0.976381583	86.16165924	2.11E-19
ENAM	-2.493442933	-1.374395321	104.9844099	4.97E-23
ENC1	2.073675261	7.417862277	402.0865113	7.85E-71
ENDOD1	-1.650167348	5.876329169	530.190176	1.72E-87
ENGASE	1.545603358	6.491942174	88.26932664	8.18E-20
ENHO	-2.389987808	-0.39419461	184.8818142	1.76E-37
ENPEP	-2.812009518	2.967996008	378.5017413	1.50E-67
ENPP6	-3.38274239	-1.009923452	539.9239146	1.10E-88
ENPP7	-2.668701663	-2.22176443	97.41348149	1.39E-21
ENTPD3	-2.184680716	0.496456578	110.5652742	4.35E-24
ENTPD5	-2.465018336	6.291587429	530.7294094	1.48E-87
ENTPD8	-2.139141076	4.806571346	99.92122909	4.60E-22
EPB41L3	-2.666647657	4.409057226	297.2527382	1.15E-55
EPB41L4A	-1.647859419	1.647233433	102.0060722	1.84E-22
EPB41L4A-DT	-1.566012486	-1.27064442	98.91404387	7.18E-22
EPCAM-DT	-2.493078116	0.546331392	361.4159646	3.95E-65
EPHA5	-2.784954131	-2.577160682	169.1378248	9.60E-35
EPHA6	-4.233178322	-1.680597314	344.8513406	9.63E-63
EPHA7	-3.489056782	1.987765716	227.0053869	1.46E-44
EPHA8	5.158007193	-1.099997495	51.25238904	2.08E-12
EPHB3	2.03230411	7.728629938	80.58247403	2.61E-18
EPHX3	1.99069976	0.05088317	45.60167528	3.08E-11
EPHX4	4.494010598	2.976565091	335.2842606	2.40E-61
EPM2A	-1.709143002	2.118767983	456.1218213	4.37E-78
EPOP	3.765987627	4.028455233	256.9786344	2.12E-49
EPYC	7.057047136	1.01573393	89.74009905	4.23E-20
ERBB4	-1.753920117	-2.794120043	38.99344519	7.43E-10
ERCC6L	1.757032072	3.237418436	149.2536287	3.26E-31
EREG	2.958878711	5.901704183	60.39533485	2.82E-14
ERFE	3.162119457	1.317355326	96.82943822	1.80E-21
ERICH2	2.015446407	0.616778324	83.18269681	8.06E-19
ERICH3	-2.015548722	-2.721117272	49.47350244	4.85E-12
ERP27	2.761302603	2.954349244	57.68126894	1.00E-13
ERVH48-1	2.580810798	-0.956109119	27.85179992	1.76E-07
ERVMER34-1	2.55806496	1.754752938	55.93369506	2.28E-13
ERVV-1	2.625147357	-2.997189756	35.75743911	3.58E-09
ERVV-2	4.216313828	-2.964669753	53.08721826	8.74E-13
ERVW-1	1.817023207	-1.14197299	17.6430828	3.01E-05
ESM1	5.626533142	2.891814542	559.3273152	4.93E-91
ESPNP	1.702652698	-2.154498922	29.47463241	7.85E-08
ESRG	3.756991303	-2.847782282	40.24495542	4.05E-10
ETFDH	-1.818903899	4.466245923	642.0089377	1.18E-100
ETHE1	-1.542717559	7.333568484	196.6753971	1.69E-39
ETV4	5.364950913	6.915425995	641.654035	1.30E-100
EVA1A	3.823530536	3.276134304	227.9154443	1.04E-44
EVPL	1.82672124	7.025828704	113.4753637	1.23E-24
EVX1	3.333228463	2.908145173	61.08106581	2.05E-14
EVX1-AS	4.340419745	-0.617697896	70.0820233	3.16E-16
EVX2	-2.90508223	-2.103548038	135.8242732	8.84E-29
EWSAT1	1.560428737	-2.407795206	32.48094196	1.78E-08
EXO1	1.583542703	3.873775016	167.3869678	1.95E-34
EXOSC5	1.511871947	5.390447983	130.791192	7.40E-28
EXTL1	-1.681556926	-1.946658669	68.9508776	5.32E-16
EXTL3-AS1	2.181089548	-1.11420969	73.52791315	6.50E-17
EYA1	3.091303378	1.476273168	36.80515606	2.15E-09
EYA2	-2.748244132	2.367310923	170.430467	5.69E-35
F12	1.690000373	4.512407306	75.27300037	2.93E-17
F13A1	-2.576118018	4.282866611	181.3414641	7.19E-37
F2	5.825308204	1.584740823	58.00790244	8.62E-14
F2RL2	1.595204944	2.849303561	57.60372679	1.04E-13
F5	2.455188508	3.219280404	36.3078301	2.74E-09
F7	3.807564004	1.461545712	56.40307969	1.83E-13
FABP1	-2.608225063	9.208540736	133.4388361	2.42E-28
FABP2	-3.087517356	3.589956181	204.6249324	7.67E-41
FABP4	-1.827422681	2.530687376	25.13684746	6.80E-07
FABP6	-1.632696815	3.669640617	41.06115373	2.73E-10
FADS2	1.82271307	5.858938988	41.78219576	1.93E-10
FADS6	-1.741563564	0.450322497	26.03510207	4.34E-07
FAM107A	-3.441970369	2.227814492	681.8278101	4.48E-105
FAM124A	-1.704447373	1.226770128	116.5538436	3.25E-25
FAM131C	2.638775235	-0.687088558	76.40888437	1.74E-17
FAM135B	-4.19131646	-1.274703579	414.9441822	1.37E-72
FAM13C	-1.820237409	0.696637892	165.8918564	3.57E-34
FAM151A	-2.291028517	0.848854736	447.2871924	6.35E-77
FAM155B	1.667111803	1.829617147	16.02879878	6.91E-05
FAM157A	1.903534334	-2.396757565	29.09171338	9.49E-08
FAM163A	-2.067450994	-1.732604048	176.2268801	5.54E-36
FAM163B	-2.915239794	-1.28310586	187.5523456	6.12E-38
FAM180B	-4.419653486	-2.670228725	575.5439687	5.71E-93
FAM181B	-2.092734384	-1.599383156	72.47965267	1.05E-16
FAM183A	1.540845721	-1.306501043	19.76371529	1.02E-05
FAM189A1	-1.881670551	2.387858702	53.1091559	8.65E-13
FAM189A2	-2.261010597	0.44061998	158.9238014	6.10E-33
FAM218A	-1.856426886	-2.224744031	70.3155833	2.84E-16
FAM222A	1.516747344	3.631225668	60.40297568	2.81E-14
FAM222A-AS1	3.58339209	0.15740565	201.8512891	2.25E-40
FAM227A	2.424867903	1.336678437	177.8876119	2.85E-36
FAM30A	-2.094585634	1.118413451	81.68992355	1.58E-18
FAM49A	-1.510421457	2.572739803	113.419611	1.26E-24
FAM53A	1.61786467	1.003037103	85.02077202	3.52E-19
FAM72A	1.556185517	0.517394064	104.5417399	6.03E-23
FAM72D	1.806262248	-0.310527803	79.61055388	4.06E-18
FAM83A	2.31840792	1.379195088	31.88317666	2.39E-08
FAM83A-AS1	1.892743715	-2.928841617	27.44169531	2.15E-07
FAM83C	1.758558462	-1.164663096	15.39155853	9.61E-05
FAM83C-AS1	2.097717932	-2.784709755	54.28684035	4.96E-13
FAM83H-AS1	2.940658267	5.219410974	338.9880392	6.88E-62
FAM89A	1.83607172	3.582376757	245.5907605	1.40E-47
FANCB	1.954136355	1.278292346	142.3438215	5.75E-30
FAP	3.110490335	3.734331898	100.992129	2.87E-22
FASN	1.53458377	8.580990196	100.3615141	3.79E-22
FAXC	-1.87265624	1.059207813	92.04501774	1.51E-20
FAXDC2	-1.737020537	4.112233474	146.3552931	1.08E-30
FBLN1	-1.558648068	6.863104518	81.28937945	1.90E-18
FBN3	1.666677405	-2.485633235	17.18571853	3.81E-05
FBXL22	-2.402095242	1.144590826	429.9632575	1.28E-74
FBXO2	2.447875658	3.365294791	41.16857971	2.59E-10
FBXO32	-2.165080312	5.649579869	295.4715077	2.15E-55
FBXO39	1.645098638	-2.061119537	28.68667059	1.16E-07
FBXO41	2.102371029	4.474260766	201.1756884	2.93E-40
FBXW12	1.592088234	-2.369760829	33.55128544	1.05E-08
FCER1A	-2.583750254	-0.052345678	193.4144831	6.08E-39
FCER2	-2.963366385	-0.15743455	137.3133386	4.73E-29
FCGBP	-2.253559996	9.990937145	62.4051798	1.10E-14
FCHO1	1.600733994	4.227216983	74.44765509	4.27E-17
FCMR	-1.580274395	2.422858909	120.4056918	6.20E-26
FCN1	-1.704065443	1.845843665	62.60874847	1.00E-14
FCRL1	-2.247324188	-0.662002713	67.51762818	1.03E-15
FCRL2	-2.313520899	0.096668085	113.2633668	1.35E-24
FCRL3	-2.02854734	0.484140854	86.70344373	1.65E-19
FCRL4	-3.205075422	-1.93322906	229.0488641	6.76E-45
FCRLA	-2.893045556	0.412078808	180.9677842	8.34E-37
FDCSP	-2.745905042	1.241325029	83.15034698	8.18E-19
FENDRR	-1.985977159	3.807473055	218.3036834	3.98E-43
FER1L4	3.13654076	4.368985371	104.6164469	5.84E-23
FER1L6	-2.355978806	2.859890322	73.18535882	7.60E-17
FERMT1	1.511469637	8.210541038	107.1394234	1.94E-23
FERMT2	-1.833431253	4.670740421	164.3933422	6.56E-34
FEV	-3.842387413	-1.147363721	243.0154791	3.63E-47
FEZ1	-1.597188622	2.402319889	178.3614968	2.36E-36
FEZF1	8.214925789	1.378023254	137.1173393	5.13E-29
FEZF1-AS1	8.436326501	2.28224072	170.8057679	4.89E-35
FEZF2	3.45934935	-3.23682118	43.7523739	7.47E-11
FGA	8.119984925	5.515007482	47.7027476	1.13E-11
FGB	8.643160552	5.118786669	51.77510276	1.63E-12
FGF10	-2.240245718	-0.15211684	128.6566014	1.83E-27
FGF14-AS2	-2.130241983	-1.206297825	156.0255864	2.00E-32
FGF17	1.796044911	-2.015736398	34.84201357	5.61E-09
FGF18	2.083803544	1.21398627	88.44413855	7.56E-20
FGF19	4.005251035	1.990724554	44.9290509	4.25E-11
FGF2	-1.712324573	2.13458458	90.75549831	2.69E-20
FGF20	5.931591148	0.090673935	66.46223921	1.68E-15
FGF23	4.008213708	-2.295299492	44.36035521	5.58E-11
FGF3	5.700076212	-1.675890775	58.45524551	6.99E-14
FGF4	1.562061899	-2.785593124	19.47753705	1.18E-05
FGF8	2.883422434	-2.648154274	53.36051244	7.68E-13
FGFBP2	-3.117348452	-1.491701788	322.776902	1.68E-59
FGFR2	-2.231557988	4.323901462	182.8504083	3.94E-37
FGFRL1	2.490910057	6.610806523	123.0615088	1.99E-26
FGG	8.449243889	4.766613034	41.54856485	2.16E-10
FGGY	1.966436931	5.343178589	46.8677492	1.68E-11
FGL1	6.811127948	2.406450357	39.6945505	5.29E-10
FGL2	-2.714949721	4.742908675	375.4908704	3.97E-67
FHL1	-3.35145496	5.422114674	558.221004	6.70E-91
FHL5	-1.69563582	0.050779965	134.1623359	1.78E-28
FIBCD1	1.809724029	4.006354056	19.93488136	9.36E-06
FIGN	-1.669613962	-0.195785356	91.94257455	1.58E-20
FILIP1	-2.62146655	1.882094508	296.2003043	1.67E-55
FIRRE	5.732610249	0.80621013	152.4558308	8.68E-32
FJX1	2.940781706	2.442617005	239.7536067	1.22E-46
FKBP10	1.94816899	6.789211278	87.57708046	1.12E-19
FLJ16779	2.688538762	-0.180003279	43.23481836	9.58E-11
FLJ31104	-1.555170328	-2.060020293	123.0261423	2.02E-26
FLJ42393	3.657065092	-1.012856281	29.16607021	9.15E-08
FLNA	-2.162733695	9.826515483	225.3760256	2.71E-44
FLNC	-3.343167349	6.293650934	374.1759415	6.09E-67
FLT3	-1.732587615	-0.642176725	81.00409963	2.16E-18
FLVCR2	-1.920560483	2.815157557	267.869931	4.03E-51
FMN2	-3.343421725	0.08025844	174.711749	1.02E-35
FMO1	-1.716170183	0.169180956	75.85060674	2.25E-17
FMO2	-1.782903587	0.366575548	42.73493705	1.22E-10
FMO3	1.551286432	0.698498456	32.05303874	2.20E-08
FMO4	-1.683079843	1.973295321	293.9720223	3.65E-55
FMO5	-1.988731753	4.405743433	239.9113386	1.15E-46
FNBP1	-1.869258308	5.308993555	382.9456874	3.56E-68
FNDC10	1.594967471	3.560328932	50.0553689	3.68E-12
FNDC11	2.662593498	0.441947557	95.57974916	3.14E-21
FNDC9	-2.056077067	-2.465127508	81.22371667	1.95E-18
FOLR1	4.511020216	2.875597277	66.46640966	1.68E-15
FOLR2	-2.348869799	2.955122004	192.7673397	7.84E-39
FOSB	-1.601609977	5.438194041	42.87146215	1.14E-10
FOSL1	2.283132982	4.101052331	74.45886088	4.24E-17
FOXA2	1.514172571	5.623529268	92.8056255	1.08E-20
FOXD1	3.044486636	1.241481309	39.5702352	5.62E-10
FOXD3	-3.430782819	-1.983358678	236.0396842	4.89E-46
FOXD3-AS1	-2.63653405	-2.377880093	119.3603289	9.71E-26
FOXF2	-2.14932273	2.917738162	261.9226521	3.49E-50
FOXG1	3.530028646	-1.485375266	31.24417887	3.28E-08
FOXI2	-1.725911349	-2.927768725	58.65935018	6.35E-14
FOXI3	4.95929486	-2.096572908	59.11838981	5.12E-14
FOXJ1	1.568901498	3.025516609	13.09669377	0.000317429
FOXL2	3.407726713	-2.570230355	38.84879615	7.97E-10
FOXL2NB	3.585179362	-2.813554122	42.30138932	1.50E-10
FOXP2	-2.268319512	2.672548931	113.5073288	1.21E-24
FOXP4-AS1	2.46715483	1.378522741	186.6150476	8.86E-38
FOXQ1	6.50271716	5.533346613	437.9157678	1.11E-75
FOXS1	1.738812716	1.1479524	92.2837051	1.36E-20
FRGCA	2.839060708	-2.124362122	57.73754786	9.78E-14
FRMD1	-1.541800505	3.636213104	58.93844565	5.57E-14
FRMD3	-1.922154919	3.109880567	143.4548431	3.62E-30
FRMD5	1.732171833	2.936115733	63.24856992	7.46E-15
FRMPD2	2.118912352	-2.893956002	24.14299498	1.12E-06
FRMPD4	-4.619695553	-1.973829335	450.6650922	2.28E-77
FRRS1L	-3.446992726	-1.267512993	259.9905635	7.04E-50
FSCN1	1.596295349	6.077184381	43.50025963	8.43E-11
FSIP2	-2.057193966	2.518088687	70.96897639	2.10E-16
FSIP2-AS1	1.68170937	-1.654643798	35.48245322	4.10E-09
FSIP2-AS2	2.535877058	-1.522369296	51.83330938	1.58E-12
FTCD	1.98347684	-0.272562774	12.81575793	0.000367797
FTX	1.94682096	2.27711683	31.63410163	2.70E-08
FUCA1	-1.744563345	6.599740186	518.8610658	4.33E-86
FUT1	2.929998478	3.229936268	322.9532173	1.58E-59
FUT9	-2.870659346	-2.878333832	89.37565659	4.98E-20
FXYD1	-3.063883148	-0.828158276	313.97024	3.45E-58
FXYD4	2.522469608	-0.722799612	46.71068839	1.81E-11
FXYD5	2.172180356	6.947582127	204.0401964	9.62E-41
FXYD6	-2.6330224	3.816522737	300.0099008	4.39E-56
FZD10	3.344420808	3.051227721	36.68887065	2.28E-09
FZD9	1.583853626	0.162154586	20.15647613	8.36E-06
G2E3-AS1	4.100615515	-2.593738432	40.13076795	4.28E-10
G6PC	-2.925751352	-0.289349261	53.31525208	7.85E-13
GABRA3	2.229224649	0.105541714	15.08610424	0.000112593
GABRA4	1.759589906	0.423014747	13.44505672	0.000264531
GABRB1	1.923099826	-1.135580825	23.92456077	1.25E-06
GABRD	2.95209609	0.69682318	209.7997312	1.04E-41
GABRE	2.477913138	5.205328838	119.8724406	7.79E-26
GABRG2	-3.020922112	-2.316647622	122.9400065	2.09E-26
GABRP	3.457974592	3.223579496	43.31577754	9.22E-11
GABRR1	2.071238293	-0.918190329	16.53326865	5.33E-05
GAD1	5.300108949	1.82974569	148.3936663	4.65E-31
GALNT15	-2.010448487	1.70758465	119.276576	1.01E-25
GALNT16	-2.623961179	0.693035524	206.9926451	3.07E-41
GALNT17	-1.935995811	0.8711582	128.9021113	1.65E-27
GALNT6	1.954576899	6.38372704	170.7664038	4.97E-35
GALR1	-3.612412494	-2.696060361	271.3924188	1.13E-51
GAP43	-3.14935368	0.275180812	216.9402713	6.70E-43
GAPT	-1.796652342	0.037703221	97.06651335	1.62E-21
GAS1RR	-2.579816631	-2.141147501	131.3641554	5.81E-28
GAS2	1.944363896	1.364288259	67.40058039	1.09E-15
GAS7	-1.561077008	4.390620309	127.4196262	3.10E-27
GAS8-AS1	1.89527886	-2.563440754	39.2169957	6.67E-10
GAST	3.765903332	-2.705428951	58.88653654	5.71E-14
GATA4	4.620423653	1.033478559	37.32205567	1.67E-09
GATA5	-2.239331139	-1.167212688	49.38513519	5.06E-12
GBA3	-4.760170363	1.617675569	475.1077958	1.49E-80
GBP6	1.50568713	-2.373760571	16.8917376	4.43E-05
GBP7	2.592372266	-2.010733256	36.89414609	2.06E-09
GBX2	5.566669789	-1.245471466	113.3234602	1.31E-24
GCG	-4.490019757	2.945482078	186.9648346	7.72E-38
GCKR	2.374630624	-1.748215839	44.75567233	4.62E-11
GCM1	2.340752498	-2.295089868	34.03130465	8.34E-09
GCNT2	-3.677049188	1.774019641	686.2492845	1.47E-105
GCNT3	-2.057204242	7.01887681	109.8676712	5.89E-24
GCNT4	-2.113934337	1.15006703	150.4080289	2.02E-31
GCNT7	1.532649615	-1.223665621	24.37656162	9.94E-07
GCSAML	-2.49411339	-1.462577971	170.3050993	5.99E-35
GDF15	3.042436476	7.62294187	164.8978234	5.34E-34
GDF5	-1.568619417	-2.154795114	33.71136711	9.75E-09
GDNF	-2.220367175	0.388383621	241.0492163	7.55E-47
GDPD2	-3.158989266	2.111148696	342.6455115	2.01E-62
GDPD3	-2.063232434	3.629582994	219.0870216	2.95E-43
GDPD5	2.916101727	5.335330438	151.2158097	1.45E-31
GFI1B	-2.005324848	-0.949566882	71.01065749	2.06E-16
GFRA1	-3.121993637	2.235523449	316.9799975	1.22E-58
GFRA2	-3.587471918	0.356922637	598.1962964	1.24E-95
GFRA3	-2.837391653	0.408493342	191.0632006	1.53E-38
GGT6	-1.713113597	6.289866835	120.4962908	5.96E-26
GGTA1P	-2.390034069	1.57669154	289.5110339	1.76E-54
GHR	-2.216087753	2.08967803	135.5976771	9.73E-29
GIMAP1	-1.631808466	1.886646315	192.6559477	8.19E-39
GIMAP7	-1.733731612	2.488651278	197.7069801	1.13E-39
GIMAP8	-1.520534057	2.857371234	161.3860378	2.23E-33
GINS1	1.722970394	5.08441368	157.6391312	1.03E-32
GJA3	3.193731067	-0.459994901	60.78005882	2.36E-14
GJB4	3.83649246	2.135139068	129.8073985	1.12E-27
GJB5	4.365636325	2.140528985	61.73779518	1.51E-14
GJB6	2.906664204	-1.375244248	36.07877265	3.06E-09
GJB7	2.743037608	-1.246003547	24.75796244	8.21E-07
GJC3	2.649215587	-0.457153026	93.98952158	6.36E-21
GLDN	-2.747032085	1.519697645	313.6766508	3.81E-58
GLI3	-1.689078089	2.497595803	84.33571944	4.79E-19
GLIPR2	-1.969772473	4.490048865	354.8646985	3.44E-64
GLP2R	-3.903751445	0.898031917	753.2738241	1.08E-112
GLRA4	-2.660474616	-0.931420195	171.3928703	3.86E-35
GLS2	2.565404125	0.222801433	168.8285856	1.09E-34
GLTP	-1.553132247	5.413339862	846.9580772	3.93E-122
GLYATL1	3.233725233	1.438297777	81.05474785	2.11E-18
GNA11	-1.63851503	7.220521648	443.486645	2.02E-76
GNAO1	-3.504319361	2.696494336	447.4249219	6.09E-77
GNB1L	1.590900774	3.52071095	119.7799342	8.11E-26
GNG13	-2.075325323	-1.099069909	58.82941226	5.86E-14
GNG2	-2.01653636	3.404424609	329.499078	1.70E-60
GNG3	-2.191184959	-1.301835377	246.8137076	8.90E-48
GNG4	2.728359335	5.525384142	49.18846084	5.55E-12
GNG7	-2.604293746	1.933549029	397.7362235	3.12E-70
GNG8	-2.435348601	-2.632083979	163.2956046	1.02E-33
GNGT1	3.407190687	-1.159783865	54.19998246	5.17E-13
GOLGA6L2	5.28648133	-2.247652983	76.15564503	1.96E-17
GOLGA7B	2.560709287	3.308941882	113.7484152	1.09E-24
GPA33	-1.770312447	8.210112272	168.7726635	1.11E-34
GPAT3	-2.471058101	3.353670087	420.5009689	2.41E-73
GPC2	1.534564957	0.903102655	80.58479541	2.61E-18
GPER1	-2.035143869	1.87518519	133.1035081	2.78E-28
GPIHBP1	-2.01960319	-0.520067577	95.44731673	3.33E-21
GPM6A	-4.4650818	1.262116519	302.6233039	1.76E-56
GPM6B	-2.678024162	2.247759144	359.4633814	7.52E-65
GPR142	-1.831064078	-3.051091706	72.50244417	1.04E-16
GPR143	2.347593276	3.142308176	57.38668502	1.15E-13
GPR15	-3.455929997	0.839578333	216.1908648	8.93E-43
GPR17	-1.5252969	-0.526956012	51.9693234	1.48E-12
GPR19	1.588559335	0.269123526	114.834729	6.83E-25
GPR27	-1.55067826	-0.300774284	38.60883528	8.95E-10
GPR3	2.198600849	0.754809824	112.4418582	1.93E-24
GPR34	-1.615721188	2.19167986	100.2592597	3.96E-22
GPR37L1	-1.578998648	1.446131634	161.8296433	1.86E-33
GPR78	1.63863553	-1.477486612	36.74699048	2.21E-09
GPR83	1.663684203	-0.255008302	13.10399804	0.000316217
GPR88	-2.066898053	-2.088037123	78.94187833	5.50E-18
GPRASP1	-1.85841611	2.154595012	176.333775	5.31E-36
GPRC6A	3.214568706	-1.92651527	34.66655865	6.11E-09
GPT	-2.79864042	4.0862429	241.4771063	6.44E-47
GPT2	1.734073235	6.38826687	156.4926877	1.65E-32
GPX3	-2.225457403	5.30922755	201.6072288	2.47E-40
GRAMD1A	1.673162055	6.486733955	218.1691367	4.19E-43
GRAMD2B	-1.61558285	4.522051575	484.8732512	8.30E-82
GRB7	2.008665592	6.18982632	77.7719326	9.36E-18
GREB1L	2.135972412	0.445861542	21.78460971	3.67E-06
GREM2	-3.695264636	2.901480736	353.6154056	5.20E-64
GRHL1	2.429210752	2.677155652	170.2872405	6.03E-35
GRHL3	4.006077215	2.505935301	188.050584	5.02E-38
GRIA1	-2.312917582	-2.150543157	100.5439753	3.50E-22
GRIA3	-1.961377575	-1.277546459	87.71427581	1.05E-19
GRIA4	-2.660839389	-1.179877082	190.0207366	2.31E-38
GRIK1	-1.501524141	-1.43507207	40.90695604	2.94E-10
GRIK3	-3.697657909	0.492963166	563.065615	1.76E-91
GRIK5	-2.885076182	0.674034806	285.5424897	7.18E-54
GRIN2A	-2.584606703	-1.537824184	112.6648103	1.75E-24
GRIN2B	3.369474323	2.942582619	149.4170533	3.04E-31
GRIN2D	5.056848451	5.3649801	404.5567779	3.59E-71
GRIN3A	-1.826810941	0.294333887	185.453717	1.40E-37
GRIN3B	1.763211331	-1.427371553	43.36762387	8.99E-11
GRINA	1.513339345	7.985240211	128.3673606	2.07E-27
GRK1	3.506781597	-0.895768554	67.42723622	1.07E-15
GRM1	2.718195452	-0.941546579	23.21232827	1.78E-06
GRM2	1.561151706	-1.471236371	56.26068589	1.96E-13
GRM4	2.044530543	-0.135830203	21.66541065	3.89E-06
GRM8	2.237966318	4.01860964	44.0010328	6.63E-11
GRP	1.986681909	0.461914668	31.57144657	2.79E-08
GRPR	2.731587617	-0.037550787	38.07244575	1.16E-09
GSC	2.188215408	-2.423455129	46.94607671	1.62E-11
GSDMA	2.340837733	1.88077516	70.35487964	2.79E-16
GSDMC	3.172818923	-1.120281332	113.5836238	1.17E-24
GSG1L	-2.779495806	-2.802009795	156.146459	1.90E-32
GSN	-1.8319853	8.648055822	274.3946034	3.84E-52
GSTA1	-3.667121329	1.908801439	196.1427135	2.09E-39
GSTA2	-4.251181334	-1.241763909	293.9338267	3.70E-55
GSTM5	-2.973315452	0.80241768	504.0308733	3.09E-84
GTF2IRD1	2.281387954	6.271353301	373.5777945	7.39E-67
GTF3A	1.890633143	7.706184007	153.581788	5.46E-32
GUCA2A	-5.052182918	5.886548436	576.6081706	4.27E-93
GUCA2B	-5.987420735	3.30872657	557.2663466	8.73E-91
GUCY1B2	1.646072432	0.045820099	38.20023835	1.09E-09
GYPC	-1.69620577	3.331416714	176.5955961	4.78E-36
GZMB	2.254181899	3.805807883	56.63799055	1.64E-13
H19	4.045410699	5.814871639	59.38554915	4.52E-14
HABP2	6.788065553	1.567540157	71.53231828	1.62E-16
HAGHL	3.622540012	3.602815328	166.6375372	2.64E-34
HAGLR	-2.158576837	3.661333164	136.1889513	7.58E-29
HAMP	3.821644219	1.123900106	39.18859744	6.76E-10
HAND1	-4.057908655	1.131752026	167.099145	2.19E-34
HAND2	-3.977891733	2.083445595	363.672833	1.88E-65
HAND2-AS1	-4.808493313	1.408760136	539.8183077	1.14E-88
HAPLN1	-2.444778846	1.743432625	277.1305766	1.44E-52
HAPLN3	1.733681541	4.039491877	71.539573	1.62E-16
HBA2	-1.941646661	2.297966819	87.305604	1.26E-19
HBB	-2.51992609	4.534129452	143.4095175	3.69E-30
HBE1	5.895815766	-0.472135947	46.0143761	2.53E-11
HBQ1	3.045506937	-2.137058132	38.83490817	8.02E-10
HCAR1	3.923915437	1.445423704	61.74046751	1.51E-14
HCAR2	2.276792395	1.241060038	30.30059608	5.22E-08
HCAR3	2.664787034	-0.032614149	33.31980705	1.18E-08
HCN1	2.398952154	0.326722451	30.05549878	5.89E-08
HCRT	3.151380967	-2.461292131	60.81139337	2.32E-14
HDAC9	-1.731075788	2.43767734	112.413919	1.95E-24
HELLS	1.552862396	4.783381507	123.6449194	1.55E-26
HEPACAM	-2.315803096	-3.053020099	74.78409553	3.66E-17
HEPACAM2	-2.33749345	4.710122311	68.42070384	6.79E-16
HEPHL1	3.025752345	1.177028183	40.86500154	3.00E-10
HES4	1.983216134	3.249533788	56.68718598	1.60E-13
HES6	1.908531657	6.155077556	98.84362764	7.40E-22
HES7	2.983180955	-2.116935522	48.15857786	9.07E-12
HGFAC	3.278455558	-1.434513694	35.41626543	4.23E-09
HHIP	-1.917104149	2.208030967	107.5903826	1.59E-23
HHLA2	-2.716949968	5.545569126	321.950547	2.22E-59
HIF3A	-2.219741739	1.597750784	132.0022658	4.43E-28
HIGD1A	-1.822958972	6.097116894	399.7562798	1.64E-70
HILPDA	2.414284703	5.08900888	259.8358718	7.45E-50
HIPK4	-1.948140845	-2.600977237	114.9187513	6.59E-25
HIST1H1B	6.168818555	2.283198272	51.91059352	1.53E-12
HIST1H1D	3.821625857	1.098111629	31.58621683	2.77E-08
HIST1H1E	5.661178269	2.211099124	54.02879555	5.60E-13
HIST1H2AB	5.246140935	-0.768606974	50.18688702	3.45E-12
HIST1H2AD	2.295350576	0.697146165	24.52443069	9.23E-07
HIST1H2AH	5.180690941	-0.303929152	52.92214591	9.45E-13
HIST1H2AJ	4.501548972	-0.168847706	41.28683453	2.45E-10
HIST1H2AL	4.086171338	-1.063437864	45.40533675	3.38E-11
HIST1H2AM	2.579479764	-0.289178152	28.69098784	1.16E-07
HIST1H2BE	3.011719456	-0.984381877	33.90071068	8.89E-09
HIST1H2BF	3.108910105	0.101802579	32.36231229	1.89E-08
HIST1H2BI	6.130725062	-0.100745363	49.28613263	5.30E-12
HIST1H2BJ	1.616582684	1.628589881	23.42058348	1.61E-06
HIST1H2BL	3.033354505	-0.145640038	35.88062504	3.38E-09
HIST1H2BO	4.292579462	0.145511135	43.35121251	9.06E-11
HIST1H3A	2.59650617	-1.242753568	23.57205131	1.49E-06
HIST1H3B	5.163347467	1.142543159	44.0825192	6.38E-11
HIST1H3C	2.784452059	0.029183587	20.78198736	6.09E-06
HIST1H3D	1.750013713	0.688460098	24.60873671	8.85E-07
HIST1H3F	2.803824653	-0.284866292	23.88115816	1.28E-06
HIST1H3I	5.107215251	-0.952111216	48.77558914	6.76E-12
HIST1H3J	4.720565421	-0.213491137	51.34823984	1.99E-12
HIST1H4A	3.691002342	-1.740288874	37.10293896	1.86E-09
HIST1H4B	5.650295818	0.094719194	51.21378158	2.12E-12
HIST1H4C	6.242847008	1.48183019	49.40587905	5.01E-12
HIST1H4D	5.346658377	1.019663062	45.87797115	2.70E-11
HIST1H4E	4.251999336	1.442965664	47.00952352	1.57E-11
HIST2H2AC	2.039418856	0.806906214	28.77773954	1.11E-07
HIST2H2BF	2.925329608	0.91949028	46.68123848	1.84E-11
HIST3H2A	1.899735485	3.792883536	92.83803815	1.06E-20
HIST3H2BB	2.172258856	-0.480330103	55.32873306	3.04E-13
HJURP	1.747997375	4.727245386	270.4932513	1.56E-51
HLF	-2.561682448	1.738773057	315.1653974	2.28E-58
HMCN2	-2.232137136	4.254856271	182.4751075	4.58E-37
HMGA1	1.503529665	9.058183784	130.1733278	9.62E-28
HMGA2	1.645584026	4.224690063	44.35572787	5.59E-11
HMGA2-AS1	3.339876412	0.140796131	60.9687137	2.16E-14
HMGCLL1	-2.845129796	-2.139679538	260.0939444	6.78E-50
HMGCS2	-2.176520466	8.00791275	80.49143231	2.72E-18
HMOX1	-1.546298711	5.031057587	190.7804072	1.71E-38
HMX2	-1.533199857	-2.484200645	24.78059216	8.12E-07
HOGA1	2.850180547	-0.252569451	70.98476258	2.09E-16
HOMER1	1.974397547	3.21526925	146.4015292	1.06E-30
HORMAD1	1.507635753	-0.829636219	12.33922609	0.000472441
HOTAIR	3.566782867	-0.521430798	32.56361799	1.71E-08
HOXB8	2.952568539	5.192847824	96.13527394	2.45E-21
HOXC-AS2	2.36099809	-2.239324135	26.06790781	4.27E-07
HOXC11	3.866509224	0.693189135	35.69233196	3.70E-09
HOXC12	5.726575026	-1.045646025	49.17178633	5.60E-12
HOXC13	4.888051774	-1.790362801	46.04252613	2.49E-11
HOXC6	1.93329561	0.882861153	17.98180941	2.53E-05
HOXD1	-2.276276466	-0.466467879	129.9394567	1.06E-27
HOXD12	-2.455692952	-1.986875599	87.04829282	1.41E-19
HP	7.438669327	5.266270906	38.78587384	8.22E-10
HPCAL4	-1.779699996	-2.341436159	63.44133354	6.82E-15
HPGD	-2.819059983	5.514402651	310.2060488	1.26E-57
HPGDS	-3.108143486	0.236610512	489.1603552	2.36E-82
HPN	2.69187484	2.466641035	27.72906457	1.87E-07
HPR	1.75198552	-1.113644012	9.939938647	0.001687343
HPSE2	-3.331938304	0.102081235	441.698712	3.49E-76
HPX	3.768382907	3.215372453	33.09042813	1.32E-08
HRCT1	-2.270999892	3.204969467	177.4681658	3.37E-36
HRK	-2.473147334	-1.74791306	88.0197071	9.15E-20
HS3ST4	4.496458282	-0.213835155	37.49992504	1.53E-09
HS3ST6	-3.980171998	-2.336621697	302.5267651	1.82E-56
HS6ST2	3.442789594	4.03378351	76.6075416	1.59E-17
HS6ST3	-1.769444784	-1.962044322	37.35579861	1.65E-09
HSD11B2	-2.195850528	7.359413693	293.2210826	4.75E-55
HSD17B2	-3.34161339	4.736147297	345.5786559	7.55E-63
HSD3B2	-5.698405467	1.028510223	460.2458838	1.26E-78
HSD52	2.816599396	-1.316658396	34.77680833	5.79E-09
HSF4	2.134161523	3.490829046	115.9281938	4.26E-25
HSP90B2P	1.519710606	-0.206249896	43.35165561	9.06E-11
HSPA2	-1.556515712	4.966196862	64.85997477	3.53E-15
HSPA6	1.813893418	2.579935451	36.85697588	2.10E-09
HSPB2	-1.641822903	-0.790748706	109.8657428	5.90E-24
HSPB3	-2.131913732	-0.583535127	42.25531991	1.54E-10
HSPB6	-3.450406005	3.997794247	273.6026048	5.10E-52
HSPB7	-2.575394532	3.074945675	134.0655421	1.85E-28
HSPB8	-3.717117297	4.042588693	496.5538317	2.71E-83
HSPH1	1.678411549	7.757681306	118.7619645	1.26E-25
HTR1D	2.902804515	3.249155121	87.1817154	1.33E-19
HTR2C	5.232460557	-2.156577802	47.59090334	1.19E-11
HTR3A	-2.543164475	-1.145324503	104.0527315	7.48E-23
HTR3C	-2.335540511	-2.153692075	54.18732031	5.20E-13
HTR3E	-3.243770837	-1.576187183	169.3372962	8.85E-35
HTR4	-2.742133814	0.184526327	139.0558096	2.28E-29
HTR7	-2.41673217	-1.421447414	206.9915014	3.07E-41
HTRA4	1.644322735	-1.125220301	37.62474737	1.44E-09
HYDIN	1.971767721	-1.790325531	23.82377558	1.31E-06
IBSP	5.922339985	0.335585502	106.8205248	2.23E-23
ICAM3	-1.525899927	0.914321269	81.96371855	1.40E-18
ICAM5	1.516248616	-0.244338991	33.08337897	1.33E-08
IER5L	2.092268395	4.086868911	144.3667776	2.48E-30
IFI6	1.678293417	6.834824477	44.48846949	5.25E-11
IFITM1	1.888355742	8.26208434	111.3271659	3.12E-24
IFITM3	1.612434272	9.056583455	95.65243754	3.04E-21
IFITM5	4.118186425	-2.60221762	67.56614271	1.01E-15
IFNE	3.851663877	-2.479799598	50.91861648	2.44E-12
IFNG-AS1	-1.568259657	-2.133787557	33.59392856	1.03E-08
IGF1	-1.759069918	0.02150816	68.12123991	7.80E-16
IGF2	5.391247986	10.45236391	45.16303404	3.80E-11
IGF2-AS	3.836050112	-1.171056659	45.02251276	4.06E-11
IGF2BP1	5.074532819	2.517164216	53.57228514	6.95E-13
IGF2BP2-AS1	2.028798378	-1.27025651	18.57226885	1.87E-05
IGF2BP3	4.046374278	2.207626187	52.0767534	1.41E-12
IGFBP1	3.993105704	0.223123339	42.86314704	1.15E-10
IGFBP6	-1.894297211	3.583651625	132.9238714	3.00E-28
IGFBP7-AS1	2.823169623	-1.069435388	36.34745119	2.69E-09
IGFL1	8.21446586	0.254878971	84.12302541	5.28E-19
IGFL2	3.413567077	1.561419021	54.60918666	4.26E-13
IGFL3	3.311555341	-1.706075598	42.1041359	1.65E-10
IGFL4	5.583473663	1.323442812	204.5507558	7.89E-41
IGFN1	2.091983022	0.671270867	27.05859161	2.60E-07
IGLL5	-1.939628251	5.707316288	59.00457844	5.40E-14
IGSF10	-2.63846482	0.903653924	167.3380815	1.99E-34
IGSF11	-3.200322705	-1.759150001	220.5411554	1.70E-43
IGSF9	-1.532776774	4.793203656	144.9558478	1.94E-30
IL11	4.663022761	2.333663601	127.2532622	3.32E-27
IL13	1.749062882	-2.669791217	22.65514258	2.36E-06
IL16	-1.782782734	3.226846163	187.5779163	6.06E-38
IL17A	2.642322397	-1.102840345	40.09553216	4.36E-10
IL17C	3.070004308	-0.94996485	48.04223651	9.59E-12
IL17F	2.336740024	-2.411204728	32.27941303	1.97E-08
IL1A	2.638316849	1.552431775	57.85300896	9.27E-14
IL1R2	-2.015906172	3.808845909	106.0505612	3.12E-23
IL1RN	1.900624252	4.383020845	47.85505891	1.05E-11
IL23A	3.129427135	1.947590842	100.0107213	4.42E-22
IL36B	2.664085448	-2.335806218	23.58595923	1.48E-06
IL36G	2.130303671	-2.065600298	31.66249636	2.67E-08
IL36RN	3.622065414	-1.959428982	49.18260715	5.57E-12
IL37	1.674596786	-0.806441132	20.06993365	8.74E-06
IL5RA	-1.783735945	-1.745654895	69.9682027	3.33E-16
IL6R	-2.708382574	4.135774354	698.4370079	7.00E-107
IL6R-AS1	-2.185286644	-2.871147635	144.1499326	2.71E-30
IMPDH1	1.695242748	6.68385134	171.0443215	4.45E-35
INA	-2.668377439	-0.347397567	118.157852	1.63E-25
INAFM2	-1.561089417	2.620924032	292.1256647	6.99E-55
INHA	2.84753873	-1.568465436	37.69172379	1.40E-09
INHBA	5.330645664	5.35028245	261.6647134	3.83E-50
INHBA-AS1	2.931124697	-1.934871008	56.7359378	1.57E-13
INHBB	2.411341073	3.337741076	56.54775233	1.71E-13
INHBE	1.90298957	0.166373235	42.22359898	1.56E-10
INSL5	-5.760167545	2.276547866	348.8456386	2.54E-63
INSYN2B	1.788290706	-2.111777545	19.87865959	9.63E-06
IQCM	-2.109523717	-2.139929804	68.04169254	8.09E-16
IQCN	-2.001737748	1.379335394	184.9467729	1.72E-37
IQGAP2	-1.594692739	5.643254396	130.3406827	8.96E-28
IQGAP3	1.998307197	6.163085547	233.1041543	1.47E-45
IRAK2	1.668986533	3.883511416	101.6692549	2.13E-22
IRF4	-2.350767994	2.643612135	172.5544112	2.42E-35
IRX2	2.840927996	2.722496505	29.78886738	6.72E-08
IRX3	3.122962816	0.447975234	52.49344013	1.16E-12
IRX5	4.187988192	0.482258989	127.0261147	3.66E-27
ISM2	3.989172181	1.710014542	54.70241644	4.08E-13
ISX	-2.186894796	4.78409329	141.304858	8.88E-30
ITGA11	1.971171782	5.016899333	67.36789847	1.10E-15
ITGA7	-1.895505385	4.10503319	223.2445904	6.08E-44
ITGA8	-1.824607093	2.405798103	243.6204408	2.90E-47
ITGB3	-1.524934339	1.510303056	116.0287833	4.08E-25
ITGBL1	2.386316648	2.460235683	46.32946711	2.17E-11
ITIH1	4.818588291	1.488700069	29.14401882	9.25E-08
ITIH2	4.302021246	1.6889866	33.20421399	1.25E-08
ITIH3	1.849387034	2.066271292	12.89104353	0.000353555
ITIH5	-2.022441873	4.573113734	225.5244377	2.56E-44
ITIH6	2.239913987	-1.912631329	28.00063673	1.63E-07
ITLN1	-2.074216417	6.747783359	33.34829351	1.16E-08
ITLN2	1.714232343	1.985384646	7.174950132	0.007568811
ITM2A	-2.263126314	3.115187701	265.2305635	1.05E-50
ITM2C	-2.18331935	9.319302447	305.1092634	7.41E-57
ITPK1-AS1	3.046480986	-1.487928015	29.4051037	8.13E-08
ITPRID1	-1.919061812	-1.282048769	55.77557507	2.46E-13
IVL	6.24185626	-1.54047659	54.19843166	5.17E-13
IZUMO1	2.291022084	-2.020092775	56.96159918	1.41E-13
IZUMO2	2.917625427	-0.817727533	38.14348285	1.12E-09
JAG2	2.086578228	5.608752624	126.5808082	4.42E-27
JAM2	-2.485796362	2.661869308	356.7665659	1.83E-64
JAM3	-1.516822721	3.953133201	194.868235	3.44E-39
JAML	-1.540539728	3.2399255	142.7739154	4.81E-30
JAZF1	-1.739312914	2.825654324	199.3156438	6.04E-40
JCAD	-1.68722161	4.454719317	116.9547596	2.74E-25
JCHAIN	-3.810927279	9.349392166	273.8015584	4.75E-52
JPH1	1.670843911	5.00066616	162.42465	1.46E-33
JPH2	-3.068167866	2.998262065	291.8517694	7.70E-55
JPH3	-1.800096306	-1.121583561	68.69678545	5.98E-16
JPH4	-2.517588369	-0.97632784	236.8804235	3.57E-46
KAAG1	1.654084822	-2.891131144	22.15359011	3.04E-06
KANK2	-1.884664086	6.077418116	370.5147262	2.01E-66
KAT2A	1.649393316	6.552745646	254.0825147	6.11E-49
KAT2B	-1.700569239	3.722477137	246.9822352	8.36E-48
KC6	1.757098216	-1.650429149	11.10778072	0.00090553
KCNA1	-3.803536754	-2.23066719	244.7635367	1.90E-47
KCNA3	-2.120665025	-0.300863513	119.4009316	9.55E-26
KCNA5	-2.617855242	-0.766612623	333.7023161	4.09E-61
KCNAB1	-1.623645096	0.90886166	101.7539444	2.05E-22
KCNB1	-3.726794445	0.002170175	268.0486462	3.78E-51
KCNB2	-1.594390227	-2.782514928	41.09213742	2.69E-10
KCNC1	-2.007813744	-2.408236461	109.7057339	6.32E-24
KCNC2	2.250206644	-1.446515132	13.82155903	0.000217313
KCNE1B	3.318083226	-1.849935192	26.27068346	3.86E-07
KCNE2	-2.66730126	-2.334975567	275.7364636	2.37E-52
KCNG3	-2.053498249	-1.437678168	84.46953852	4.51E-19
KCNH4	2.193659077	-0.168688125	67.02541417	1.29E-15
KCNH8	2.586674765	2.438177948	116.2338247	3.73E-25
KCNIP1	-1.949934693	-2.514692639	78.06693068	8.19E-18
KCNIP3	-1.556386944	0.555585844	90.414113	3.13E-20
KCNIP4	-2.324001359	0.980275045	319.2081212	5.69E-59
KCNJ14	2.070908771	1.442364791	188.8700913	3.64E-38
KCNJ15	2.223606924	1.017926475	44.99842931	4.11E-11
KCNJ16	-1.617830431	-1.706098144	32.92780206	1.43E-08
KCNK10	-1.740157739	0.976041704	85.41349577	2.95E-19
KCNK15	1.616834605	0.738759801	21.31855032	4.64E-06
KCNK2	-1.917253083	-1.363473412	52.36699942	1.23E-12
KCNK3	-2.880315563	0.383807093	166.7253194	2.55E-34
KCNK9	2.736744261	-0.052189428	51.28972228	2.05E-12
KCNMA1	-3.13375459	4.420308827	301.0672799	3.03E-56
KCNMB1	-3.250237897	3.293760679	339.8959327	5.07E-62
KCNMB2	-1.711882497	-2.11044233	49.52459239	4.73E-12
KCNN3	-2.412012928	2.176458371	396.52991	4.58E-70
KCNN4	1.678546972	6.718826469	72.97996277	8.35E-17
KCNQ1OT1	3.110816422	4.021571034	59.88974034	3.57E-14
KCNQ5	-1.994095092	-1.264387297	62.16758195	1.23E-14
KCNS2	-1.973636215	-2.429328334	69.87297948	3.48E-16
KCNT1	2.030310928	0.031148635	27.12153468	2.52E-07
KCNT2	-1.639264167	-0.999859835	64.60059364	3.98E-15
KCNV2	2.085350255	-2.480618896	38.81236568	8.11E-10
KCP	1.860240503	1.696227003	83.75097574	6.24E-19
KCTD16	2.016907738	-0.067328821	24.27081138	1.05E-06
KCTD19	1.751531474	-1.769808878	39.12774755	6.96E-10
KCTD4	-2.024823492	-1.441103963	42.79056183	1.19E-10
KCTD8	-2.636192754	-2.960276024	103.2776444	1.05E-22
KHDRBS2	-4.160131303	-2.731507713	437.3716754	1.31E-75
KIAA0408	-3.226621172	-3.048922085	217.4401513	5.54E-43
KIAA0513	-1.896779537	4.172056602	296.4820003	1.51E-55
KIAA1211	-2.047200265	3.83021132	240.5949415	8.94E-47
KIAA1257	3.497793828	2.281176595	279.5973015	5.96E-53
KIAA1549	2.359151184	4.862025253	353.4291849	5.53E-64
KIAA1549L	2.092219489	2.247755598	31.1360664	3.46E-08
KIAA2012	1.976772989	-1.392385105	53.2391918	8.13E-13
KIF12	1.64572398	5.156388305	58.66477717	6.33E-14
KIF14	1.839655541	3.594902417	143.5506139	3.48E-30
KIF18B	1.878153945	4.608374682	220.718277	1.59E-43
KIF1A	-2.645808223	1.185254269	90.45497816	3.08E-20
KIF20A	1.594002917	4.767315954	203.4719021	1.20E-40
KIF25	1.756706021	-0.599568689	30.18871479	5.52E-08
KIF26B	3.197161381	3.888260227	123.6098574	1.57E-26
KIF4B	1.712671492	-2.788372238	37.59659196	1.46E-09
KIF5A	-2.515747003	0.941009365	193.6376104	5.57E-39
KIF5C	-2.007018947	1.236720115	123.9464827	1.36E-26
KIFC2	1.700167897	4.685966429	77.28911998	1.17E-17
KIR2DL4	-1.961615103	-0.974037121	69.47164402	4.19E-16
KIRREL3	-1.860941175	-0.481987338	91.33236553	2.08E-20
KISS1	2.858208153	-0.020510544	74.75051229	3.71E-17
KISS1R	3.134285895	-1.240981871	53.43810642	7.41E-13
KIT	-1.686073574	3.326819531	93.72232967	7.17E-21
KLB	-2.021921743	0.016491134	164.7104473	5.77E-34
KLC3	5.719965067	0.155471275	162.5941806	1.36E-33
KLF4	-2.436722128	6.702683977	416.886939	7.45E-73
KLF9	-1.857664503	4.794001898	229.4481158	5.82E-45
KLHL17	1.760865192	3.082637385	111.7605034	2.59E-24
KLHL31	1.872848147	0.878044513	103.3618466	1.01E-22
KLHL34	-1.852748783	-0.350585963	46.38070798	2.12E-11
KLHL35	3.928861301	2.805604598	178.1625113	2.55E-36
KLK10	5.095582496	5.666257822	121.2981224	4.23E-26
KLK11	3.275750687	3.516948515	56.55671801	1.70E-13
KLK12	3.139987273	2.537100745	41.99130025	1.74E-10
KLK15	-1.846116643	0.698753364	69.88469567	3.46E-16
KLK5	6.233304869	-0.248692792	47.69096874	1.13E-11
KLK6	9.389629739	4.835849721	170.607493	5.30E-35
KLK7	8.335383666	2.689106477	117.9994671	1.74E-25
KLK8	8.741569766	1.535191302	129.1761724	1.47E-27
KLRB1	-1.880193632	1.548300493	169.4797033	8.36E-35
KLRF1	-2.013901147	-2.071211772	113.5692822	1.18E-24
KLRG2	3.324669374	0.367005475	41.01942082	2.79E-10
KREMEN2	2.282781324	1.327202087	82.97162202	8.87E-19
KRT1	-2.384266946	-1.448176988	94.24982755	5.67E-21
KRT13	2.603940618	-0.395297072	25.28054058	6.32E-07
KRT14	3.024197252	1.866149323	15.42761948	9.43E-05
KRT15	1.702129067	3.182059266	74.831709	3.58E-17
KRT16	6.006652836	1.983108973	72.7937475	9.10E-17
KRT17	5.227177436	4.996153356	103.4554106	9.72E-23
KRT20	-2.672957172	8.647984155	247.212155	7.68E-48
KRT222	-2.655547823	-2.831098156	136.3119324	7.20E-29
KRT23	7.402550044	6.26345762	161.4958195	2.13E-33
KRT24	-5.811974607	-1.056803342	502.9571252	4.22E-84
KRT31	7.146841559	-1.043023412	60.83338697	2.52E-14
KRT32	4.428456439	-2.644737223	55.86334024	2.36E-13
KRT35	4.551717036	-2.753786203	57.68675044	1.00E-13
KRT37	4.790189299	-2.767531031	68.14233123	7.73E-16
KRT38	4.23822073	-3.031246552	56.13624928	2.08E-13
KRT39	2.244456539	-1.422826987	20.86455734	5.84E-06
KRT4	3.078541127	-1.261157662	32.8303818	1.50E-08
KRT40	3.126894553	2.349181556	25.19160223	6.61E-07
KRT42P	2.223284014	-2.670312263	32.29721897	1.95E-08
KRT5	4.251779066	3.416087748	28.98324199	1.00E-07
KRT6A	5.763246967	3.363647475	53.39193643	7.57E-13
KRT6B	5.581555352	4.031864476	82.99462016	8.78E-19
KRT6C	5.413191359	-1.392825451	59.01032691	5.39E-14
KRT7	3.720730129	3.768182694	75.26709213	2.93E-17
KRT7-AS	3.474276432	-1.699260271	82.33585495	1.18E-18
KRT75	7.094143108	0.886910419	112.5682745	1.82E-24
KRT80	6.692510481	5.39963428	602.5868702	3.83E-96
KRT83	3.792967603	-1.287793418	60.23375833	3.04E-14
KRT87P	2.930386026	-2.488122168	67.3554619	1.11E-15
KRT9	-2.951362285	-2.902984069	180.4182948	1.04E-36
KRTAP13-2	-5.146474805	-1.179543063	388.6598912	5.66E-69
KRTAP3-1	5.430302797	-2.211382656	68.2113083	7.48E-16
KRTAP3-2	3.617745362	-3.05027796	57.79820966	9.51E-14
KRTAP5-1	2.244422505	0.19727351	95.8411304	2.80E-21
KRTAP5-4	3.796722196	-2.392634486	99.95925095	4.52E-22
KY	-2.562987138	-1.826645218	191.7591227	1.16E-38
LAIR2	2.629781695	-0.465863888	62.9386939	8.61E-15
LAMA1	-2.577233048	2.270625207	262.1492598	3.21E-50
LANCL3	-1.626051917	1.327926026	120.9188021	4.97E-26
LAPTM4B	1.542545166	7.570102338	77.04794887	1.30E-17
LARGE2	4.570177387	5.487243651	268.2752051	3.48E-51
LBP	4.153559229	1.994337753	34.64870823	6.16E-09
LBX2	1.808972823	0.389141512	121.9399784	3.21E-26
LCE1E	4.303221304	-3.188091076	57.20279517	1.37E-13
LCMT1-AS2	2.557145258	-0.9419331	25.83557559	4.79E-07
LCN10	-2.541578017	-2.91238465	131.780892	4.87E-28
LCN12	2.226831659	2.266292565	79.75519368	3.80E-18
LCN15	3.785237431	5.982304623	24.8505644	7.84E-07
LCN2	2.350447813	9.440114955	46.03606623	2.50E-11
LCN6	-2.728045973	-2.50290322	147.3968217	7.03E-31
LDB3	-4.066251008	1.677964249	490.5690188	1.56E-82
LDHD	-2.860320105	4.018020606	353.4631988	5.47E-64
LDLRAD1	1.664782632	-1.440665571	23.81501953	1.32E-06
LDLRAD3	1.997819156	4.019573033	146.2326161	1.14E-30
LEF1	2.157569793	3.951964207	119.2124095	1.04E-25
LEF1-AS1	2.287334993	-1.483452478	120.0227415	7.31E-26
LEMD1	6.139917552	2.059497364	194.2482344	4.38E-39
LEMD1-AS1	3.36030473	-2.35854838	63.39254532	6.97E-15
LEP	-1.521531177	-0.667926959	15.2666792	0.000102536
LEXM	-2.45497642	-1.701416214	246.823063	8.86E-48
LGALS12	-1.501908751	-1.500575763	33.26461613	1.21E-08
LGALS14	1.688977502	-2.93008008	13.19259116	0.000301882
LGALS17A	1.530954029	-0.685753095	15.41206423	9.51E-05
LGALS2	-2.625225862	3.473442026	168.091072	1.46E-34
LGALS4	-1.820084852	10.45784034	262.1061705	3.26E-50
LGALS7	2.644383535	-2.747077643	51.58982261	1.78E-12
LGALS7B	2.644383535	-2.747077643	51.58982261	1.78E-12
LGALS9B	-1.938857823	1.909573642	67.16493358	1.21E-15
LGALS9C	-2.597736904	2.317311188	136.8011115	5.86E-29
LGI1	-5.111783444	-1.722181293	603.0955595	3.34E-96
LGI3	-1.810427654	-1.767092932	47.66691564	1.15E-11
LGI4	-2.026369352	2.431015471	144.7153076	2.14E-30
LGR5	2.939720962	6.335797928	98.11914152	1.02E-21
LGR6	2.166292998	4.809915821	47.33452045	1.34E-11
LHB	2.019874533	-2.861908444	40.46406157	3.65E-10
LHFPL3-AS1	2.224879477	-3.121153506	26.02472907	4.36E-07
LHX1	3.834550719	-2.697059925	43.34411308	9.09E-11
LHX5	3.488127302	-2.315979582	50.72151159	2.68E-12
LIF	1.89079	5.161977799	144.7082366	2.15E-30
LIFR	-3.282967315	2.368912051	477.9399827	6.43E-81
LIFR-AS1	-2.300929271	-2.217589696	162.0372372	1.71E-33
LILRA4	-1.964613549	-1.597896137	89.45855954	4.80E-20
LILRB5	-2.601478165	2.031788425	295.1212397	2.44E-55
LILRP2	-1.753885909	-2.644368696	68.84038701	5.60E-16
LIME1	1.794382306	2.149645338	97.11204888	1.59E-21
LIMS2	-2.356419506	4.74811369	241.7370448	5.84E-47
LIN28A	3.300579186	-2.476804596	30.1459211	5.64E-08
LIN28B	4.710374656	-1.572652582	35.52888636	4.01E-09
LINC00092	-2.514072912	-1.778775461	285.7373587	6.70E-54
LINC00114	1.64670786	0.553087584	34.0321203	8.33E-09
LINC00216	1.76524008	-1.339288582	23.07944162	1.91E-06
LINC00346	2.086728389	2.061952001	122.7434701	2.28E-26
LINC00355	5.483464715	-1.873639881	54.16260683	5.26E-13
LINC00365	1.507641869	0.436380787	43.13772987	1.00E-10
LINC00402	-2.040051003	-2.475846901	69.91121767	3.42E-16
LINC00461	-2.661056171	-2.779719896	145.0877152	1.83E-30
LINC00484	-2.601094358	-2.621879668	120.8440045	5.14E-26
LINC00488	-2.093044671	-2.983064219	67.6808805	9.56E-16
LINC00507	-4.01354314	-3.143284295	416.6356084	8.06E-73
LINC00524	3.598745882	-2.555265383	52.10369254	1.39E-12
LINC00525	1.763327411	-0.36378551	47.52639813	1.23E-11
LINC00545	2.97919701	-2.934836135	46.99956494	1.58E-11
LINC00552	2.341210577	-2.664585013	37.87171735	1.28E-09
LINC00582	-2.363197228	-2.584991474	129.8401362	1.11E-27
LINC00618	2.456338612	-2.420441646	76.84905576	1.43E-17
LINC00624	1.949337268	-0.257016422	33.73695709	9.63E-09
LINC00658	3.37733238	-2.35461927	52.77099685	1.02E-12
LINC00698	3.816437259	-2.364957824	86.40756147	1.89E-19
LINC00858	5.899637544	0.727338733	159.7638225	4.32E-33
LINC00877	-1.612186962	-1.853330387	76.13978805	1.97E-17
LINC00885	2.561224089	-2.780092629	38.86371763	7.91E-10
LINC00887	2.096963976	-2.375554875	42.43721062	1.41E-10
LINC00894	1.905728116	1.442537825	61.41072119	1.76E-14
LINC00896	2.214533329	0.145016004	71.6991829	1.50E-16
LINC00922	2.68072088	-2.510357847	67.20783797	1.19E-15
LINC00939	1.965093648	-1.966557876	19.8896155	9.58E-06
LINC00940	-2.320728787	-1.074153977	99.89656526	4.65E-22
LINC00958	2.52760124	-1.341182839	33.81113425	9.28E-09
LINC00974	-4.59022739	-2.128736845	490.2832839	1.70E-82
LINC00996	-1.543591666	-0.194240583	96.51774925	2.07E-21
LINC01013	-2.231937782	-2.455616504	126.1038931	5.42E-27
LINC01016	-1.870776976	-2.937872572	78.27624409	7.45E-18
LINC01036	6.570072258	-1.024381427	62.54938781	1.03E-14
LINC01050	4.683986264	-2.163398788	91.66047258	1.80E-20
LINC01060	2.778245614	-3.101966428	42.40538998	1.43E-10
LINC01082	-2.633409364	-0.187182402	228.8657065	7.25E-45
LINC01101	5.277299127	-1.820617687	128.5501113	1.91E-27
LINC01121	2.180901903	-2.463965079	33.99841898	8.47E-09
LINC01124	2.495404742	1.662369568	86.12028383	2.15E-19
LINC01132	1.776273622	-0.048970741	123.947466	1.36E-26
LINC01133	-1.620718001	3.96285695	137.3279002	4.70E-29
LINC01135	-1.732449769	-2.384381559	134.4239224	1.59E-28
LINC01140	-1.944105507	-1.15559534	139.8942098	1.60E-29
LINC01146	2.659151708	-0.852528275	46.96183385	1.61E-11
LINC01169	5.707864359	-1.054354706	78.68379977	6.19E-18
LINC01186	2.185540086	-1.363544258	100.3404228	3.82E-22
LINC01215	-1.707967225	-1.20015063	67.27842053	1.15E-15
LINC01234	7.538476448	2.104116634	115.6599337	4.78E-25
LINC01267	2.802893412	-2.638773957	49.13432466	5.70E-12
LINC01269	2.725358983	-2.017554978	59.18618177	4.96E-14
LINC01270	1.718968651	-0.763428537	74.63033554	3.92E-17
LINC01271	1.770596318	-2.723813051	44.4874601	5.25E-11
LINC01303	2.420969019	-2.229510006	48.85482224	6.51E-12
LINC01315	1.878075956	2.410867868	97.47860481	1.35E-21
LINC01317	2.546581131	-3.188583083	29.902823	6.35E-08
LINC01320	2.546581131	-3.188583083	29.902823	6.35E-08
LINC01354	-2.303560268	-2.542627831	116.2787851	3.66E-25
LINC01356	2.708001869	0.034876433	152.7194172	7.78E-32
LINC01411	6.668782349	1.170384888	96.1137546	2.48E-21
LINC01414	3.459893578	-3.17899668	42.76069184	1.20E-10
LINC01426	1.943752115	-0.540156483	45.92557605	2.64E-11
LINC01433	2.763102225	-2.857735784	95.72645636	2.94E-21
LINC01473	1.613789998	-0.107615856	42.69761419	1.24E-10
LINC01475	-2.434118123	-2.298685554	176.4999022	4.97E-36
LINC01484	2.263203486	-1.858803949	66.13816441	1.95E-15
LINC01502	-1.787807345	-2.787702678	33.81645132	9.26E-09
LINC01511	5.214808546	-1.42352288	82.49894332	1.10E-18
LINC01537	-2.42788481	-2.488491492	176.5470468	4.87E-36
LINC01549	3.42440883	-2.14868796	54.661647	4.16E-13
LINC01555	3.061699547	-0.09665986	89.0067785	5.88E-20
LINC01564	2.139005253	-2.290535271	35.02154655	5.13E-09
LINC01572	1.902098469	-0.232335436	94.64026362	4.77E-21
LINC01593	4.514374761	-2.603721454	90.1754402	3.48E-20
LINC01594	3.994733017	-1.024917918	99.66298226	5.16E-22
LINC01602	6.634458097	-0.866754381	89.67031306	4.37E-20
LINC01615	3.240549371	-1.528946866	107.7051614	1.51E-23
LINC01630	3.732896867	-2.42189804	42.33651411	1.48E-10
LINC01655	4.442505064	-2.907490977	87.2296373	1.30E-19
LINC01687	-3.187792562	-2.563057905	155.2872944	2.71E-32
LINC01694	2.837737076	0.68138926	46.84056196	1.70E-11
LINC01711	3.434288313	-2.188955593	106.4196874	2.65E-23
LINC01730	2.84212568	-1.157775812	90.66819324	2.80E-20
LINC01748	4.085490236	1.122662928	119.7935129	8.06E-26
LINC01749	2.740381331	-2.771926691	39.11363858	7.01E-10
LINC01778	-1.807974857	-2.269180819	75.41622523	2.74E-17
LINC01781	-2.368082642	-2.543006965	113.2028491	1.38E-24
LINC01807	3.777489766	-1.135148637	49.35660998	5.13E-12
LINC01819	4.096045385	3.262171393	41.45078966	2.26E-10
LINC01829	-2.492585988	-2.673383469	108.1576107	1.24E-23
LINC01833	4.448695851	0.519939609	63.28121485	7.35E-15
LINC01836	2.660834694	-0.571112399	111.284115	3.18E-24
LINC01840	2.107935934	-2.10384443	30.71850099	4.25E-08
LINC01844	1.784086652	-3.029186434	27.86345359	1.75E-07
LINC01876	1.899086434	0.223795524	30.1147461	5.72E-08
LINC01913	5.104994909	-1.880228776	54.8923284	3.73E-13
LINC01929	3.311002357	-1.510121465	68.17436487	7.61E-16
LINC01942	2.859116139	-2.666927534	71.76496287	1.46E-16
LINC01954	-2.926955838	-2.561980416	196.9656427	1.51E-39
LINC01977	3.972340561	-0.377249535	180.2816104	1.10E-36
LINC01978	3.789946355	1.715904784	139.8540135	1.63E-29
LINC01979	3.236796347	1.202968353	155.6420011	2.34E-32
LINC01996	4.474760512	-1.185095797	91.67959776	1.78E-20
LINC02000	-3.550897418	-2.966693938	358.1228018	1.17E-64
LINC02023	-3.892651533	-1.423282509	282.5733913	2.06E-53
LINC02027	3.857320134	-3.088370126	52.65826458	1.07E-12
LINC02033	-2.110617648	-2.81622834	122.7106597	2.31E-26
LINC02043	2.443510598	-2.807460368	59.20217614	4.93E-14
LINC02057	-2.505221992	-1.612489138	140.59669	1.19E-29
LINC02097	1.652089405	-2.408170359	26.94290318	2.76E-07
LINC02107	5.525639161	-1.557975402	55.42970594	2.89E-13
LINC02119	5.525639161	-1.557975402	55.42970594	2.89E-13
LINC02178	5.413873268	-2.120428899	57.90424437	9.05E-14
LINC02188	4.081310963	-1.751439528	54.13671587	5.32E-13
LINC02254	4.20562013	-1.874551364	61.71603583	1.52E-14
LINC02257	5.3332547	-1.602121478	110.1287627	5.26E-24
LINC02263	4.110575854	-3.103685394	65.17424562	3.05E-15
LINC02266	4.446956699	-2.740002624	77.41123265	1.10E-17
LINC02292	-1.943513915	-2.465714985	106.8930876	2.16E-23
LINC02345	3.376184401	-1.155397379	78.14083678	7.92E-18
LINC02362	-1.671669073	0.602789372	100.4138902	3.70E-22
LINC02365	2.29940141	-2.99057401	29.01906275	9.84E-08
LINC02381	-1.549875924	0.195077154	124.1268576	1.26E-26
LINC02389	1.508850416	-3.056210392	23.61933911	1.45E-06
LINC02408	-1.914113127	-2.652520322	77.46230161	1.08E-17
LINC02418	8.221004774	4.245610173	215.0528876	1.38E-42
LINC02428	5.090058977	-2.185014343	69.32852992	4.47E-16
LINC02441	-2.32151998	1.213372008	147.154703	7.77E-31
LINC02473	1.574831766	-0.952581493	24.22116719	1.08E-06
LINC02475	3.301874413	-2.202918337	35.35138273	4.37E-09
LINC02487	1.749848998	1.536565369	65.97192462	2.11E-15
LINC02490	-4.69474238	-2.406844459	474.5087323	1.78E-80
LINC02525	3.400633777	-2.100537365	38.10895893	1.14E-09
LINC02541	-1.832502513	-2.073446423	106.8454296	2.20E-23
LINC02544	3.904036717	-2.067552799	68.19043066	7.56E-16
LINC02560	2.925981104	-2.58734998	57.17389278	1.27E-13
LINC02561	1.553981357	-2.703687328	28.25364276	1.44E-07
LINC02563	4.276178797	-1.679864041	68.62104116	6.19E-16
LINC02582	6.609080245	-0.699288022	50.40306622	3.12E-12
LINC02595	3.896365212	-1.555058476	127.5384287	2.94E-27
LINC02616	-2.413142803	-3.040613267	89.36793519	5.00E-20
LINC02649	1.755816501	-0.809913236	35.86068318	3.41E-09
LINC02657	2.809668552	-1.820293475	61.69076952	1.54E-14
LINCR-0001	2.488386725	-0.503876131	45.9028053	2.66E-11
LIX1	-2.419457568	-2.321309437	83.57181324	6.76E-19
LMCD1-AS1	1.67865035	-1.008032804	75.4950108	2.64E-17
LMO3	-3.714822284	2.367192608	324.6128053	8.96E-60
LMO7-AS1	2.802163649	-1.24152219	97.74226625	1.20E-21
LMOD1	-3.580263554	5.463744297	398.0948843	2.78E-70
LMTK3	2.277858319	2.985447417	143.5097685	3.54E-30
LMX1A	-1.881247017	-1.717590598	35.23986909	4.62E-09
LOC100128006	-3.892541502	-2.37853027	418.7973948	4.10E-73
LOC100128059	1.731875291	-2.405972538	29.75449276	6.84E-08
LOC100128108	-1.603052246	-2.639952831	75.92283505	2.17E-17
LOC100128239	-1.896836795	-1.731956571	99.10066538	6.61E-22
LOC100128882	1.734864236	-2.233115447	41.32366698	2.41E-10
LOC100131315	1.687453064	-1.887773294	25.77846282	4.93E-07
LOC100132813	1.519231204	-2.475576503	22.45770214	2.61E-06
LOC100240735	-1.847170954	-2.584327273	84.75239411	3.97E-19
LOC100287036	2.222357052	-2.013520078	42.81186148	1.17E-10
LOC100288175	1.503205732	1.102902061	62.48235428	1.07E-14
LOC100291105	-1.514374675	-1.9351139	98.37935868	9.09E-22
LOC100505782	6.027592654	-1.863152389	83.24953224	7.82E-19
LOC100506071	1.569345594	-2.688369372	20.32236562	7.69E-06
LOC100506142	1.934304585	-1.213266232	25.50749858	5.65E-07
LOC100506289	-3.074559879	-2.579710086	236.2568594	4.51E-46
LOC100506388	-1.599303428	-1.520092257	60.21692275	3.06E-14
LOC100506551	2.781201478	-1.482362228	44.98218717	4.14E-11
LOC100506725	-1.603398303	-2.726591817	64.75878644	3.70E-15
LOC100507156	1.621805643	-1.205553397	28.75976942	1.12E-07
LOC100507377	4.3073813	-2.742904104	62.24465581	1.19E-14
LOC100507388	1.733484837	-1.357679343	13.31066746	0.000283792
LOC100507506	-1.767350588	-2.41292266	120.0482022	7.23E-26
LOC101926943	3.137834269	-0.719607468	41.48937426	2.22E-10
LOC101926964	3.897474454	-0.235686876	102.9501463	1.21E-22
LOC101927136	3.673635073	-0.688252539	42.06364233	1.68E-10
LOC101927318	5.69039187	-0.752689758	130.7652433	7.48E-28
LOC101927394	1.67865035	-1.008032804	75.4950108	2.64E-17
LOC101927476	1.615577321	-2.076944637	53.70663921	6.52E-13
LOC101927480	4.630110611	2.172340176	259.5990152	8.13E-50
LOC101927531	2.255886243	-2.530243637	17.07939303	4.03E-05
LOC101927604	1.861946329	-2.569372678	62.38939018	1.11E-14
LOC101927884	6.97332113	-0.088642239	186.7810143	8.30E-38
LOC101927911	1.733265258	-2.808896202	21.60656858	4.01E-06
LOC101927972	3.402895527	-2.4267406	37.31355743	1.68E-09
LOC101928100	2.02679071	2.051825522	42.27423989	1.52E-10
LOC101928295	1.748848042	-0.963357308	22.04983965	3.21E-06
LOC101928303	1.982119074	-0.776177001	34.72664981	5.93E-09
LOC101928307	-2.581630325	-3.156212062	143.6509465	3.34E-30
LOC101928673	-1.561661372	-0.594378646	164.8623142	5.42E-34
LOC101928731	-3.708187103	-0.669726864	159.358111	5.10E-33
LOC101928797	2.272383799	-0.901277238	30.37708292	5.03E-08
LOC101928834	-1.758383044	-2.134014693	75.02075577	3.28E-17
LOC101928994	-1.831949628	-1.144423975	81.04359893	2.12E-18
LOC101929128	4.231871883	-1.520436361	84.40863914	4.64E-19
LOC101929331	-1.570549221	-2.034465545	69.42452388	4.28E-16
LOC101929340	-2.057124782	0.004802432	272.9990402	6.34E-52
LOC101929532	3.000949075	-1.731541394	64.52947902	4.11E-15
LOC101929536	2.138029686	-1.062822382	92.34427048	1.32E-20
LOC101929705	4.508013403	1.094417261	211.360133	5.69E-42
LOC101929759	1.978310591	-1.045107778	51.89115993	1.54E-12
LOC101929777	2.48272052	1.922838695	186.2264145	1.03E-37
LOC102723322	1.712049719	-2.744382248	38.7538888	8.34E-10
LOC102724050	-3.613023991	-2.762284587	270.3944946	1.62E-51
LOC102724153	-4.442820538	-0.891443102	532.6431182	8.60E-88
LOC102724488	-1.668614543	-2.839784869	65.02496599	3.27E-15
LOC102724908	6.940795737	-0.121299439	66.31895164	1.79E-15
LOC105369332	1.914481228	-0.755398079	127.9539344	2.47E-27
LOC105369340	2.055507179	0.918839719	117.4889534	2.17E-25
LOC105370526	2.513713036	-0.689262554	28.74015533	1.13E-07
LOC105370854	-2.222700128	0.073023524	151.1210087	1.50E-31
LOC105371795	2.228309011	-0.2653766	115.4306871	5.28E-25
LOC105375009	-3.152160402	-3.017607235	215.8361831	1.02E-42
LOC105375800	2.694693672	-0.490578637	147.5683585	6.54E-31
LOC105376557	1.638392348	-1.631466546	30.90183347	3.88E-08
LOC105377372	4.139863982	-2.268136969	51.57994386	1.78E-12
LOC107984125	5.09940213	-1.717227723	91.39894818	2.02E-20
LOC107985194	-2.052006545	-2.52852314	92.36841027	1.31E-20
LOC107986453	1.518997062	-1.788640632	23.42413902	1.60E-06
LOC107987478	-1.975153233	1.396060968	118.7200226	1.28E-25
LOC107987479	-1.975153233	1.396060968	118.7200226	1.28E-25
LOC112267859	-1.874298148	0.840717483	150.4692883	1.97E-31
LOC157273	4.231871883	-1.520436361	84.40863914	4.64E-19
LOC200772	3.557704483	-0.508400764	45.51135236	3.21E-11
LOC283856	-2.475933446	-2.767487996	141.7389095	7.41E-30
LOC284191	-2.524136806	-3.016723426	143.4146806	3.68E-30
LOC284798	3.167587308	-2.381045092	38.85456254	7.95E-10
LOC284930	4.699406942	-2.828305299	54.83374421	3.83E-13
LOC285097	-2.377347916	-2.310472574	108.0734763	1.29E-23
LOC344967	2.379119367	-2.126903626	38.77500844	8.26E-10
LOC388780	2.52103951	-0.789741075	74.63463294	3.92E-17
LOC389602	2.607275435	4.4412696	141.6985769	7.53E-30
LOC400464	-1.668136975	-2.371901684	75.782851	2.32E-17
LOC400553	-2.110795753	-2.565612351	91.05339159	2.35E-20
LOC400655	3.878393053	-0.190282075	27.07756645	2.58E-07
LOC400684	1.893955199	-0.64001826	72.9241587	8.57E-17
LOC440910	4.676357447	-2.423186081	46.90493904	1.65E-11
LOC692247	1.607172266	0.865789551	46.99393388	1.58E-11
LOC729558	-2.167486726	-1.264314783	35.19051336	4.73E-09
LOC91370	1.828273383	-0.652609585	92.87235643	1.05E-20
LONRF2	-3.677613312	0.498888034	217.8533382	4.73E-43
LOXL2	1.722127626	6.022009137	107.2596497	1.84E-23
LOXL4	-1.501459161	1.425401736	65.57147825	2.54E-15
LPAL2	1.537711558	0.107328984	71.34125183	1.77E-16
LPAR1	-2.164047521	3.428824439	316.134286	1.64E-58
LPO	4.748608396	-0.056248722	87.90157611	9.65E-20
LRAT	-3.297675726	-1.44305648	198.8167194	7.34E-40
LRCH2	-2.264075818	0.776395196	191.5270585	1.28E-38
LRFN5	-2.139973076	-1.037229775	122.5346553	2.49E-26
LRMP	-2.483329044	2.146758439	255.2151776	4.04E-49
LRP2	3.468699715	-1.228155701	37.12498965	1.84E-09
LRP8	2.952283712	4.590047568	388.902549	5.24E-69
LRRC15	1.767884475	3.902657657	43.18898905	9.80E-11
LRRC19	-2.756661546	4.938718716	318.4837016	7.29E-59
LRRC2-AS1	1.966072124	-2.60552551	51.6424563	1.73E-12
LRRC36	3.272256677	1.956703364	123.8694922	1.41E-26
LRRC43	2.018929349	-0.258831885	71.12207541	1.96E-16
LRRC4C	-1.843812798	-1.04537643	57.63087543	1.03E-13
LRRC52-AS1	1.720441167	-2.280562167	16.63946592	5.05E-05
LRRC55	-1.862781801	-0.85186283	107.2958827	1.81E-23
LRRC66	-1.782363147	3.046187905	180.5453824	9.87E-37
LRRC74A	1.57055721	-2.375186623	23.7769383	1.34E-06
LRRC8E	2.470750815	0.252323539	202.3236787	1.87E-40
LRRC9	2.313718207	-1.82429047	50.56063912	2.89E-12
LRRN2	-3.440914455	2.681784249	426.8656614	3.34E-74
LRRN4	2.973716479	-1.166152204	85.1784106	3.28E-19
LRRN4CL	-1.809357843	1.594681217	183.4017716	3.17E-37
LTB4R	1.586666998	3.016951698	85.4417913	2.91E-19
LTK	-1.622776074	2.891263079	54.17494116	5.23E-13
LUCAT1	3.20844443	-0.338332189	58.09356363	8.28E-14
LUZP2	-2.195924452	-0.159240717	115.0630957	6.19E-25
LVRN	-3.175002608	-1.510544129	297.1430881	1.20E-55
LY6D	5.289472438	1.167722437	50.82683185	2.55E-12
LY6E	1.98113521	7.404986351	72.82388061	8.97E-17
LY6G6C	3.238085783	0.646434833	87.39713342	1.21E-19
LY6G6D	5.444595673	3.409730721	84.78284132	3.92E-19
LY6G6F	5.377054784	-1.634574101	132.9954538	2.91E-28
LY6G6F-LY6G6D	5.559123078	3.408026023	90.26902824	3.34E-20
LY6H	-2.101431326	-0.637248925	98.77792013	7.62E-22
LY9	-2.071280363	0.871945289	153.3901718	5.90E-32
LYNX1	-2.549187702	1.932078697	242.2602282	4.81E-47
LYPD3	2.013633542	2.299477334	47.57268593	1.20E-11
LYPD8	-3.589674114	5.923125756	255.2203605	4.03E-49
LYVE1	-4.160802409	2.712787884	643.4505539	8.14E-101
LZTS1	1.700217169	2.52999065	90.72987062	2.72E-20
LZTS3	2.311811707	5.421470105	143.6593956	3.32E-30
MAB21L1	-3.390678772	-2.0180637	305.6217146	6.20E-57
MAB21L2	-3.366186287	3.916529162	370.7179127	1.88E-66
MACC1	2.343583531	6.164532893	202.0161315	2.11E-40
MADCAM1	-2.286625308	0.848122037	176.6841222	4.61E-36
MAF	-1.65266313	4.458781054	174.8106502	9.78E-36
MAFA	-1.968833677	-2.653103819	90.14609612	3.53E-20
MAFG-DT	3.115933314	2.612479957	361.3427306	4.05E-65
MAGEA1	7.552745584	-0.133885874	50.04969041	3.69E-12
MAGEA11	6.347761974	1.008447833	52.68311336	1.06E-12
MAGEA12	9.028588714	1.612805789	58.61264745	6.49E-14
MAGEA3	10.4300301	2.689056552	64.40041931	4.37E-15
MAGEA4	6.407705761	-0.28529811	48.16772743	9.03E-12
MAGEA6	9.523167124	2.377390182	59.73472837	3.84E-14
MAGEB17	5.5528403	1.568257059	66.52067843	1.63E-15
MAGEB2	5.08648108	-0.572499956	34.92616342	5.38E-09
MAGEC1	6.351249783	-1.45083358	50.6808298	2.73E-12
MAGEC2	6.668531507	-0.927918807	47.68866657	1.13E-11
MAK	1.739193275	0.126834866	32.70011057	1.60E-08
MAL	-3.612950713	-0.04094269	474.6727638	1.69E-80
MALAT1	3.448090799	9.485354341	48.51197766	7.66E-12
MALL	-2.273265835	3.8105378	293.8119648	3.86E-55
MAMDC2	-4.723705975	1.76267247	594.9307465	2.98E-95
MAOA	-1.948687787	7.183342985	235.2509949	6.57E-46
MAOB	-2.296105707	3.491717242	117.4631535	2.20E-25
MAP1A	-1.696335512	3.899414168	131.5319391	5.41E-28
MAP1LC3C	-1.687884414	-2.648349193	72.05083985	1.28E-16
MAP3K20-AS1	4.069144081	1.688391274	66.57650068	1.59E-15
MAP6	-2.175301346	0.891100673	195.4912947	2.69E-39
MAP7D2	2.417186171	3.604845226	32.46850416	1.79E-08
MAPK10	-1.981616252	1.084801124	198.9445648	6.98E-40
MAPK15	4.336636673	2.87313659	178.6577953	2.10E-36
MAPK4	-3.705107269	-0.221473768	260.4233584	6.02E-50
MAPT	-2.323766424	1.259194321	131.1514694	6.35E-28
MASP1	-3.22072572	2.660785543	191.1628382	1.47E-38
MAT1A	3.8609554	2.621455074	58.33094836	7.41E-14
MATN2	-1.770766413	5.538803943	134.1484027	1.79E-28
MATN3	2.74990979	1.800790928	70.70739205	2.37E-16
MB	-2.107399688	2.000419646	95.20135565	3.71E-21
MBNL1-AS1	-2.724522051	2.189862711	413.7282777	2.00E-72
MC1R	1.541101303	1.960513514	77.43408722	1.09E-17
MCEMP1	2.840024987	0.548734664	55.12273509	3.34E-13
MCIDAS	3.99386151	0.187757332	220.3094562	1.85E-43
MCM10	1.754685329	3.821682626	198.8047919	7.37E-40
MCOLN2	-1.704612052	3.527277689	92.58609615	1.19E-20
MDFI	3.69942546	3.945506063	310.7382743	1.05E-57
MEF2C	-1.560020903	3.690661643	157.2012233	1.23E-32
MEF2C-AS1	-2.834294549	-1.972986034	219.9435479	2.13E-43
MEGF10	-1.824998189	-1.091430216	75.52472598	2.61E-17
MEGF11	2.265266061	0.424194361	36.83230035	2.12E-09
MEGF6	1.644228199	4.376001173	54.03993491	5.57E-13
MEIS1	-1.869049632	3.255201841	151.0785419	1.53E-31
MEIS2	-1.955805207	2.593263963	127.1068222	3.54E-27
MELTF	1.894980657	5.919749873	74.31261343	4.54E-17
MELTF-AS1	1.964470598	1.353954095	153.7427612	5.11E-32
MEP1A	-2.286686969	7.174673833	147.3088074	7.29E-31
MEP1B	-5.509658914	1.94012609	738.0117118	4.24E-111
MET	1.852095464	7.392020483	239.771406	1.21E-46
METTL24	-3.411432274	-0.84669127	369.0341647	3.25E-66
METTL7A	-2.431117913	5.875093052	454.2825857	7.61E-78
[truncated: 1,523 more rows]
