# Supplementary material for: Analysis of DNA methylation-driven genes for predicting the prognosis of patients with colorectal cancer
Source: Aging (Albany NY). 2020 Nov 16;12(22):22814–39. doi: 10.18632/aging.103949 (PMC7746389; doi:10.18632/aging.103949)
Supplement: Supplementary Table 2 [file aging-12-103949-s003..csv]

Supplementary Table 2. Methylation-driven genes among the DEGs.
gene	HR	Wald value	95%CI	p-value
ABCB1	0.986892091	-0.296823653	0.99 [0.90, 1.08]	0.766601146
ACTL10	0.963119788	-0.418475834	0.96 [0.81, 1.15]	0.675599251
AFAP1.AS1	1.076449282	2.683713242	1.08 [1.02, 1.14]	0.007280953
AKR1E2	1.02737876	0.525410287	1.03 [0.93, 1.14]	0.599298004
ALX1	1.037400649	0.765327567	1.04 [0.94, 1.14]	0.444076512
ANKRD18B	1.027807063	0.637956934	1.03 [0.94, 1.12]	0.523501715
ANO5	1.014233211	0.353084963	1.01 [0.94, 1.10]	0.724024746
APOA2	0.968687385	-0.754606868	0.97 [0.89, 1.05]	0.450484901
AQP5	1.011909337	0.350650848	1.01 [0.95, 1.08]	0.725850304
AREG	0.934499685	-1.330947862	0.93 [0.85, 1.03]	0.183206167
ARL14	0.931984101	-1.207821503	0.93 [0.83, 1.04]	0.227115929
ARL4D	1.099739307	1.356492747	1.10 [0.96, 1.26]	0.174942441
AXIN2	0.894566262	-2.012012535	0.89 [0.80, 1.00]	0.044218616
AZGP1	0.985743035	-0.274698013	0.99 [0.89, 1.09]	0.783548258
B3GNT7	0.948757847	-1.23027535	0.95 [0.87, 1.03]	0.218594012
BEX4	1.05021684	0.833352874	1.05 [0.94, 1.18]	0.404645745
BHLHA9	1.00017349	0.003464365	1.00 [0.91, 1.10]	0.997235842
BMP3	0.96386988	-0.990097612	0.96 [0.90, 1.04]	0.322126411
BRINP3	0.960327287	-0.984687896	0.96 [0.89, 1.04]	0.3247774
C5orf38	0.961430884	-1.268701982	0.96 [0.90, 1.02]	0.204547375
CACNG4	1.040444134	1.351011957	1.04 [0.98, 1.10]	0.176691602
CALCA	0.993235571	-0.19189321	0.99 [0.93, 1.06]	0.847825857
CCDC169	1.033540961	0.649573275	1.03 [0.94, 1.14]	0.515967901
CEL	0.996488073	-0.120574074	1.00 [0.94, 1.06]	0.904028405
CES3	0.978380271	-0.426896936	0.98 [0.88, 1.08]	0.669454397
CGREF1	1.004438509	0.07050747	1.00 [0.89, 1.14]	0.943789755
CHST4	1.008074427	0.272788466	1.01 [0.95, 1.07]	0.785015826
CIDEB	1.035536947	0.580278291	1.04 [0.92, 1.17]	0.561726965
CILP2	1.127349928	2.62602888	1.13 [1.03, 1.23]	0.008638749
CKMT2	0.95583053	-1.374941236	0.96 [0.90, 1.02]	0.169149664
CLDN1	1.053413634	0.786235154	1.05 [0.93, 1.20]	0.431729735
CLDN10	0.97490689	-0.654629321	0.97 [0.90, 1.05]	0.512706441
CMBL	0.947125775	-0.932709003	0.95 [0.84, 1.06]	0.350970235
CPNE8	0.965053624	-0.591146408	0.97 [0.86, 1.09]	0.554422327
CSAG1	1.042651478	1.232530752	1.04 [0.98, 1.11]	0.217750886
CT83	1.012029323	0.203244033	1.01 [0.90, 1.14]	0.838944297
CTAG2	1.001354051	0.024975535	1.00 [0.90, 1.11]	0.980074478
CWH43	0.960237152	-1.265600858	0.96 [0.90, 1.02]	0.205656019
CYP24A1	0.957263347	-1.034481618	0.96 [0.88, 1.04]	0.300911066
CYP2B7P	1.020338119	0.362114106	1.02 [0.91, 1.14]	0.717266763
DAW1	1.050384981	0.686537882	1.05 [0.91, 1.21]	0.492373985
DKK1	0.988134282	-0.320843878	0.99 [0.92, 1.06]	0.748328706
DLX6	0.954746398	-1.29961102	0.95 [0.89, 1.02]	0.193734321
DMRTA1	1.019597693	0.350313239	1.02 [0.91, 1.14]	0.726103631
DNAH14	0.965129982	-0.671863149	0.97 [0.87, 1.07]	0.501670822
DSC3	0.989730616	-0.331267363	0.99 [0.93, 1.05]	0.740442541
EDNRA	1.006836376	0.11046999	1.01 [0.89, 1.14]	0.912036649
ELF5	1.043126888	1.567682228	1.04 [0.99, 1.10]	0.116955311
EPHA7	0.979824095	-0.437120153	0.98 [0.89, 1.07]	0.662024212
EPHX3	1.127226382	2.050980672	1.13 [1.01, 1.26]	0.040268829
EPHX4	0.876510923	-2.250390344	0.88 [0.78, 0.98]	0.024424177
ERVMER34.1	1.050485474	1.088218306	1.05 [0.96, 1.15]	0.276498745
EVA1A	0.942040528	-1.00011244	0.94 [0.84, 1.06]	0.317256097
FABP1	1.008306654	0.2497257	1.01 [0.94, 1.08]	0.802799482
FADS6	1.017316075	0.476447789	1.02 [0.95, 1.09]	0.633755395
FAM181B	1.002171581	0.032552764	1.00 [0.88, 1.14]	0.974031239
FAM218A	0.980730593	-0.30317199	0.98 [0.86, 1.11]	0.761758794
FAM83C	0.997687641	-0.050160837	1.00 [0.91, 1.09]	0.95999422
FGF20	0.997855137	-0.061132018	1.00 [0.93, 1.07]	0.95125407
FIRRE	1.015955349	0.403602009	1.02 [0.94, 1.10]	0.686505408
FOXG1	1.037136493	0.879241065	1.04 [0.96, 1.12]	0.379270583
FOXQ1	1.096728323	1.603656145	1.10 [0.98, 1.23]	0.108789868
FZD10	0.954843386	-1.371182633	0.95 [0.89, 1.02]	0.170318031
GALNT16	1.025631472	0.494072945	1.03 [0.93, 1.13]	0.621254664
GFRA3	1.028570035	0.533077541	1.03 [0.93, 1.14]	0.593979905
GHR	1.03026323	0.587650506	1.03 [0.93, 1.14]	0.556766903
GNG4	1.039504867	1.199116103	1.04 [0.98, 1.11]	0.230482804
GPR143	0.963114506	-1.009547734	0.96 [0.90, 1.04]	0.312712021
GREB1L	1.001005531	0.026683697	1.00 [0.93, 1.08]	0.978712016
HABP2	1.013984807	0.422578521	1.01 [0.95, 1.08]	0.6726028
HBQ1	1.049604453	0.889495689	1.05 [0.94, 1.17]	0.373736739
HCAR1	1.004188881	0.121131794	1.00 [0.94, 1.07]	0.903586646
HHLA2	0.962245914	-0.816614967	0.96 [0.88, 1.06]	0.414148499
HIST3H2A	1.04689753	0.51674051	1.05 [0.88, 1.25]	0.605337313
HYDIN	0.982144871	-0.331396577	0.98 [0.88, 1.09]	0.74034495
IFITM1	0.925408234	-1.047227757	0.93 [0.80, 1.07]	0.294994546
INA	1.02888176	0.563105697	1.03 [0.93, 1.14]	0.573362912
IZUMO2	0.913962584	-2.113556136	0.91 [0.84, 0.99]	0.034553196
KCNA3	0.941621525	-1.118260267	0.94 [0.85, 1.05]	0.263455851
KHDRBS2	1.074775816	0.778948985	1.07 [0.90, 1.29]	0.436009766
KLHL34	0.988973743	-0.275626807	0.99 [0.91, 1.07]	0.782834718
KLRG2	1.051217539	1.361097894	1.05 [0.98, 1.13]	0.173482755
KRT20	0.972665165	-0.612006244	0.97 [0.89, 1.06]	0.540533626
KRT40	0.970655083	-0.911581735	0.97 [0.91, 1.03]	0.361988941
KRTAP5.4	0.980239907	-0.30963347	0.98 [0.86, 1.11]	0.756839701
LAPTM4B	1.002908624	0.042696631	1.00 [0.88, 1.15]	0.965943365
LGALS2	0.923526205	-1.602416821	0.92 [0.84, 1.02]	0.109063468
LINC00346	1.011527949	0.16669154	1.01 [0.88, 1.16]	0.867612763
LINC00885	1.037395886	0.57629074	1.04 [0.92, 1.18]	0.564418681
LINC00939	0.962998306	-0.709522375	0.96 [0.87, 1.07]	0.478000371
LINC01356	1.079740326	1.153268326	1.08 [0.95, 1.23]	0.248800266
LRFN5	0.997581406	-0.043269325	1.00 [0.89, 1.11]	0.965486843
LY6E	1.146225224	1.995365808	1.15 [1.00, 1.31]	0.046002997
LY6G6D	0.984814977	-0.611924642	0.98 [0.94, 1.03]	0.540587617
MAGEA1	1.115697683	2.710899715	1.12 [1.03, 1.21]	0.006710092
MAGEA4	1.038772465	1.049977993	1.04 [0.97, 1.12]	0.293728231
MAGEB2	1.004816696	0.103597196	1.00 [0.92, 1.10]	0.917489013
MEP1A	0.953481937	-1.152926686	0.95 [0.88, 1.03]	0.248940478
MIA	1.022518989	0.529497651	1.02 [0.94, 1.11]	0.596460273
MIOX	1.116950808	2.194293487	1.12 [1.01, 1.23]	0.028214317
MIR181A2HG	1.092332967	1.391319166	1.09 [0.96, 1.24]	0.164128664
MSX2	0.963127704	-0.888427677	0.96 [0.89, 1.05]	0.374310743
MT1E	1.004715846	0.098798512	1.00 [0.92, 1.10]	0.92129825
MYBL2	1.034554981	0.392368282	1.03 [0.87, 1.23]	0.694786118
NAP1L2	1.045395744	0.854616756	1.05 [0.94, 1.16]	0.392763348
NAT2	0.892096405	-2.546004298	0.89 [0.82, 0.97]	0.010896385
NEFH	1.027525231	0.432815579	1.03 [0.91, 1.16]	0.665148755
NEUROG2	0.99387254	-0.158341225	0.99 [0.92, 1.07]	0.874187925
NMU	1.033367474	0.77103386	1.03 [0.95, 1.12]	0.440686862
NOVA1	1.101151951	2.052141287	1.10 [1.00, 1.21]	0.040155933
NPY1R	0.996169987	-0.092110173	1.00 [0.92, 1.08]	0.926610506
NT5DC4	1.058284687	1.033544737	1.06 [0.95, 1.18]	0.301349046
NXPH3	1.055722181	1.181457895	1.06 [0.96, 1.16]	0.23742087
PABPC5	1.038117712	0.599790536	1.04 [0.92, 1.17]	0.548645841
PAH	0.9447057	-1.753728502	0.94 [0.89, 1.01]	0.079477039
PCDH10	1.085705387	1.527709139	1.09 [0.98, 1.21]	0.12658477
PCDH20	0.988260535	-0.220593406	0.99 [0.89, 1.10]	0.825409036
PCP4L1	0.998263748	-0.034811999	1.00 [0.91, 1.10]	0.972229652
PF4	0.941003005	-1.565555754	0.94 [0.87, 1.02]	0.117452655
PGC	1.030133419	0.705427811	1.03 [0.95, 1.12]	0.480544042
PHGDH	1.107734987	1.891034948	1.11 [1.00, 1.23]	0.058619679
PIGR	0.974358061	-1.07623818	0.97 [0.93, 1.02]	0.281820749
PLA2G3	0.963361615	-1.217358898	0.96 [0.91, 1.02]	0.223467694
POU4F1	1.120215467	2.402765529	1.12 [1.02, 1.23]	0.016271617
PPBP	0.994316897	-0.182253576	0.99 [0.94, 1.06]	0.855383729
PPP1R14A	1.151078282	1.997033797	1.15 [1.00, 1.32]	0.045821512
PRDM13	0.965198272	-0.805158509	0.97 [0.89, 1.05]	0.420728216
PTF1A	0.986168169	-0.327793627	0.99 [0.91, 1.07]	0.743067706
PTPRO	0.959782899	-0.960886687	0.96 [0.88, 1.04]	0.336609145
RASSF10	0.958103745	-0.968063044	0.96 [0.88, 1.04]	0.333012885
RBP1	0.917972301	-1.758840305	0.92 [0.83, 1.01]	0.078604637
REG4	0.961195544	-1.754191006	0.96 [0.92, 1.00]	0.079397784
REP15	0.897112782	-2.45928144	0.90 [0.82, 0.98]	0.013921543
RHCG	1.040935544	0.953443218	1.04 [0.96, 1.13]	0.340365553
RIC3	1.08906564	1.665237589	1.09 [0.99, 1.20]	0.095865364
RIPPLY3	0.997596421	-0.060279209	1.00 [0.92, 1.08]	0.95193326
RSPO4	1.084262585	2.121807155	1.08 [1.01, 1.17]	0.033853936
SLC14A1	1.015434262	0.419272925	1.02 [0.95, 1.09]	0.675016681
SLC22A31	1.05766024	1.451662052	1.06 [0.98, 1.14]	0.146595596
SLC30A2	0.975792015	-0.7213286	0.98 [0.91, 1.04]	0.470707365
SLC35D3	0.985864699	-0.407041556	0.99 [0.92, 1.06]	0.683977467
SLC3A1	0.987201416	-0.274745254	0.99 [0.90, 1.08]	0.783511961
SLC51B	0.948600664	-1.159526914	0.95 [0.87, 1.04]	0.246241472
SLC5A6	0.985904705	-0.16027359	0.99 [0.83, 1.17]	0.872665562
SLCO4C1	0.855951816	-2.908426774	0.86 [0.77, 0.95]	0.003632522
SMOC1	0.984282256	-0.457938811	0.98 [0.92, 1.05]	0.646996402
SNCA	1.036665667	0.6340178	1.04 [0.93, 1.16]	0.526069205
SOX1	1.029405167	0.98133478	1.03 [0.97, 1.09]	0.326427677
SOX14	1.003431327	0.105275772	1.00 [0.94, 1.07]	0.916156987
SP5	1.007713707	0.151538754	1.01 [0.91, 1.11]	0.879550742
SPAG17	0.9915274	-0.15671576	0.99 [0.89, 1.10]	0.875468866
SPDYC	1.018106741	0.380673059	1.02 [0.93, 1.12]	0.703445862
SRPX2	0.996766594	-0.061771366	1.00 [0.90, 1.10]	0.950744907
SUSD5	1.118428101	2.14207495	1.12 [1.01, 1.24]	0.032187451
SYNE4	0.979461811	-0.521606443	0.98 [0.91, 1.06]	0.601944376
TBX18	0.963075369	-0.983333596	0.96 [0.89, 1.04]	0.32544328
TBX20	0.943324791	-1.480570518	0.94 [0.87, 1.02]	0.138721057
TCN1	0.975020009	-0.828371824	0.98 [0.92, 1.04]	0.407459958
TGFBI	0.931120869	-1.068392814	0.93 [0.82, 1.06]	0.285343357
TGIF2	0.976134147	-0.317011188	0.98 [0.84, 1.13]	0.751235113
TMEM171	1.035501875	0.512460939	1.04 [0.91, 1.18]	0.608328451
TMEM220	0.882368002	-1.865050065	0.88 [0.77, 1.01]	0.062174387
TMEM37	0.961656586	-0.583130259	0.96 [0.84, 1.10]	0.559805615
TMPRSS5	0.988825391	-0.245289395	0.99 [0.90, 1.08]	0.806232362
TNNC2	1.013838112	0.366229477	1.01 [0.94, 1.09]	0.714193849
TRIM29	1.014670545	0.260844976	1.01 [0.91, 1.13]	0.794212059
TRIM58	1.050593014	1.203842507	1.05 [0.97, 1.14]	0.228650457
TUSC8	0.978450886	-0.578433351	0.98 [0.91, 1.05]	0.562971582
TWIST1	1.053438203	0.896639783	1.05 [0.94, 1.18]	0.369911162
UCN3	0.924969698	-1.86771434	0.92 [0.85, 1.00]	0.061801899
VENTX	1.036438358	0.941237808	1.04 [0.96, 1.12]	0.346583005
VSIG2	0.96284054	-1.131194798	0.96 [0.90, 1.03]	0.257973111
VSTM2B	0.984361723	-0.284751922	0.98 [0.88, 1.10]	0.775834209
WASIR2	1.079861589	1.393492525	1.08 [0.97, 1.20]	0.163470904
WDR17	1.017387158	0.352883594	1.02 [0.92, 1.12]	0.724175711
WIF1	0.964837048	-1.26104709	0.96 [0.91, 1.02]	0.207291882
ZNF135	1.001542692	0.024581287	1.00 [0.89, 1.13]	0.980388946
ZNF280A	1.072464124	1.411955454	1.07 [0.97, 1.18]	0.157963078
ZNF471	0.956411844	-0.89988159	0.96 [0.87, 1.05]	0.368183268
ZNF556	1.108735562	2.893667963	1.11 [1.03, 1.19]	0.003807706
ZNF677	1.01652552	0.258295224	1.02 [0.90, 1.15]	0.796179072
