# Supplementary material for: Analysis of DNA methylation-driven genes for predicting the prognosis of patients with colorectal cancer
Source: Aging (Albany NY). 2020 Nov 16;12(22):22814–39. doi: 10.18632/aging.103949 (PMC7746389; doi:10.18632/aging.103949)
Supplement: Supplementary Table 5 [file aging-12-103949-s005..xlsx]

## Sheet: 18gene functional annotation ta
Supplementary Table 5. Gene ontology for 18 survival-associated methylation-driven genes.
Gene Name	GOTERM_BP_DIRECT	GOTERM_CC_DIRECT	GOTERM_MF_DIRECT
IZUMO family member 2(IZUMO2)	GO:0006355~regulation of transcription, DNA-templated,	GO:0005634~nucleus,GO:0016021~integral component of membrane,	GO:0003700~transcription factor activity, sequence-specific DNA binding,GO:0043565~sequence-specific DNA binding,GO:0044212~transcription regulatory region DNA binding,
MAGE family member A1(MAGEA1)	GO:0000122~negative regulation of transcription from RNA polymerase II promoter,GO:0006351~transcription, DNA-templated,GO:0045746~negative regulation of Notch signaling pathway,	GO:0005634~nucleus,GO:0005737~cytoplasm,GO:0005886~plasma membrane,	GO:0005515~protein binding,GO:0042826~histone deacetylase binding,
N-acetyltransferase 2(NAT2)	GO:0006805~xenobiotic metabolic process,GO:0008152~metabolic process,GO:0015807~L-amino acid transport,GO:1902475~L-alpha-amino acid transmembrane transport,	GO:0005829~cytosol,GO:0005886~plasma membrane,GO:0016021~integral component of membrane,	GO:0004060~arylamine N-acetyltransferase activity,GO:0005515~protein binding,GO:0015179~L-amino acid transmembrane transporter activity,GO:0016407~acetyltransferase activity,
NOVA alternative splicing regulator 1(NOVA1)	GO:0000398~mRNA splicing, via spliceosome,GO:0006396~RNA processing,GO:0007268~chemical synaptic transmission,GO:0007626~locomotory behavior,GO:0008380~RNA splicing,GO:0051252~regulation of RNA metabolic process,	GO:0005634~nucleus,GO:0005730~nucleolus,GO:0043231~intracellular membrane-bounded organelle,	GO:0003723~RNA binding,GO:0003729~mRNA binding,GO:0044822~poly(A) RNA binding,
POU class 4 homeobox 1(POU4F1)	GO:0000122~negative regulation of transcription from RNA polymerase II promoter,GO:0001967~suckling behavior,GO:0003223~ventricular compact myocardium morphogenesis,GO:0006357~regulation of transcription from RNA polymerase II promoter,GO:0006366~transcription from RNA polymerase II promoter,GO:0007409~axonogenesis,GO:0007416~synapse assembly,GO:0007498~mesoderm development,GO:0010628~positive re…	GO:0000790~nuclear chromatin,GO:0005654~nucleoplasm,GO:0043005~neuron projection,	GO:0000980~RNA polymerase II distal enhancer sequence-specific DNA binding,GO:0000981~RNA polymerase II transcription factor activity, sequence-specific DNA binding,GO:0001077~transcriptional activator activity, RNA polymerase II core promoter proximal region sequence-specific binding,GO:0001205~transcriptional activator activity, RNA polymerase II distal enhancer sequence-specific binding,GO:000…
R-spondin 4(RSPO4)	GO:0016055~Wnt signaling pathway,GO:0030177~positive regulation of Wnt signaling pathway,GO:0035878~nail development,	GO:0005576~extracellular region,	GO:0008201~heparin binding,
RAB15 effector protein(REP15)	GO:0001881~receptor recycling,GO:0033572~transferrin transport,	GO:0010008~endosome membrane,GO:0031901~early endosome membrane,GO:0048471~perinuclear region of cytoplasm,GO:0055037~recycling endosome,	GO:0005515~protein binding,
axin 2(AXIN2)	GO:0001934~positive regulation of protein phosphorylation,GO:0001957~intramembranous ossification,GO:0003139~secondary heart field specification,GO:0003413~chondrocyte differentiation involved in endochondral bone morphogenesis,GO:0006355~regulation of transcription, DNA-templated,GO:0008283~cell proliferation,GO:0008285~negative regulation of cell proliferation,GO:0009950~dorsal/ventral axis spe…	GO:0005634~nucleus,GO:0005654~nucleoplasm,GO:0005737~cytoplasm,GO:0005794~Golgi apparatus,GO:0005813~centrosome,GO:0005829~cytosol,GO:0005881~cytoplasmic microtubule,GO:0005886~plasma membrane,GO:0005938~cell cortex,GO:0014069~postsynaptic density,GO:0015630~microtubule cytoskeleton,GO:0016023~cytoplasmic, membrane-bounded vesicle,GO:0030877~beta-catenin destruction complex,	GO:0005096~GTPase activator activity,GO:0005515~protein binding,GO:0008013~beta-catenin binding,GO:0019899~enzyme binding,GO:0019901~protein kinase binding,GO:0031625~ubiquitin protein ligase binding,GO:0070016~armadillo repeat domain binding,GO:0070411~I-SMAD binding,
cartilage intermediate layer protein 2(CILP2)		GO:0005578~proteinaceous extracellular matrix,GO:0070062~extracellular exosome,	GO:0004035~alkaline phosphatase activity,GO:0004551~nucleotide diphosphatase activity,
epoxide hydrolase 3(EPHX3)		GO:0005576~extracellular region,GO:0016021~integral component of membrane,	GO:0016787~hydrolase activity,
epoxide hydrolase 4(EPHX4)		GO:0016021~integral component of membrane,	GO:0016787~hydrolase activity,
lymphocyte antigen 6 complex, locus E(LY6E)	GO:0007166~cell surface receptor signaling pathway,	GO:0005887~integral component of plasma membrane,GO:0031225~anchored component of membrane,
myo-inositol oxygenase(MIOX)	GO:0019310~inositol catabolic process,GO:0055114~oxidation-reduction process,	GO:0005737~cytoplasm,GO:0016234~inclusion body,GO:0070062~extracellular exosome,	GO:0004033~aldo-keto reductase (NADP) activity,GO:0005506~iron ion binding,GO:0008199~ferric iron binding,GO:0016651~oxidoreductase activity, acting on NAD(P)H,GO:0016701~oxidoreductase activity, acting on single donors with incorporation of molecular oxygen,GO:0050113~inositol oxygenase activity,
protein phosphatase 1 regulatory inhibitor subunit 14A(PPP1R14A)	GO:0035304~regulation of protein dephosphorylation,GO:0035690~cellular response to drug,GO:0042325~regulation of phosphorylation,GO:0043086~negative regulation of catalytic activity,	GO:0005737~cytoplasm,GO:0005829~cytosol,	GO:0004865~protein serine/threonine phosphatase inhibitor activity,
solute carrier organic anion transporter family member 4C1(SLCO4C1)	GO:0007275~multicellular organism development,GO:0007283~spermatogenesis,GO:0030154~cell differentiation,GO:0043252~sodium-independent organic anion transport,	GO:0005886~plasma membrane,GO:0005887~integral component of plasma membrane,GO:0016323~basolateral plasma membrane,GO:0070062~extracellular exosome,	GO:0015347~sodium-independent organic anion transmembrane transporter activity,
sushi domain containing 5(SUSD5)	GO:0007155~cell adhesion,GO:0007219~Notch signaling pathway,	GO:0016021~integral component of membrane,	GO:0005540~hyaluronic acid binding,
zinc finger protein 556(ZNF556)	GO:0006351~transcription, DNA-templated,GO:0006355~regulation of transcription, DNA-templated,	GO:0005622~intracellular,GO:0005634~nucleus,	GO:0003676~nucleic acid binding,GO:0003677~DNA binding,GO:0046872~metal ion binding,
